# Supplementary material for: Sugar thiourea catalyzed highly enantioselective Michael addition of 2-hydroxy-1,4-naphthoquinone to β-nitroalkenes
Source: Royal Society of Chemistry journal article supplement (doi:10.1039/c2ra22270a), 2012-11-06
Supplement: c2ra22270a.pdf [file c2ra22270a.pdf]

# Supporting Information

## Sugar thiourea catalyzed highly enantioselective Michael addition of 2-hydroxy-1,4-naphthoquinone to $\beta$ -nitroalkenes

B. V. Subba Reddy,\*S. Madhusudana Reddy and Manisha Swain

*Natural Product Chemistry, CSIR-Indian Institute of Chemical Technology, Hyderabad, Andhra Pradesh, India, 500 007.E-mail:basireddy@iict.res.in; Fax: 91-40-27160512.*

### Table of contents.

|                                           |       |
|-------------------------------------------|-------|
| 1. General remarks.....                   | (S2)  |
| 2. Copy of NMR Spectra of ligands.....    | (S3)  |
| 3. Copies of NMR spectra of products..... | (S9)  |
| 4. HPLC chromatogram of products.....     | (S16) |

## General Remarks.

All reactions were carried out under nitrogen atmosphere. Commercial reagents were used as received, unless otherwise stated.  $^1\text{H}$  NMR were recorded on a 300 MHz or 500 MHz spectrometer using  $\text{CDCl}_3$  and  $\text{DMSO-D}_6$  as solvent.  $^{13}\text{C}$  NMR were recorded on 75 MHz and 125 MHz spectrometer using  $\text{CDCl}_3$  and  $\text{DMSO-D}_6$ . TMS was used as reference for  $^1\text{H}$  NMR analysis and  $\text{CDCl}_3$  used as reference for  $^{13}\text{C}$  NMR analysis. All the compounds were purified by column chromatography on silica gel (60-120 mesh) using hexane - ethyl acetate mixtures as eluent. Mass analysis was carried out using ESI mass spectrometer. Infrared (IR) spectra were recorded on a FT-IR spectrometer. Optical rotations were measured using a Rudolph (Digipol 781 M6U) polarimeter. The ee values determination was carried out using chiral high-performance liquid chromatography (HPLC) with Daicel Chiracel OJ-H and AS-H columns. The absolute configurations of new compounds were determined by analogy.

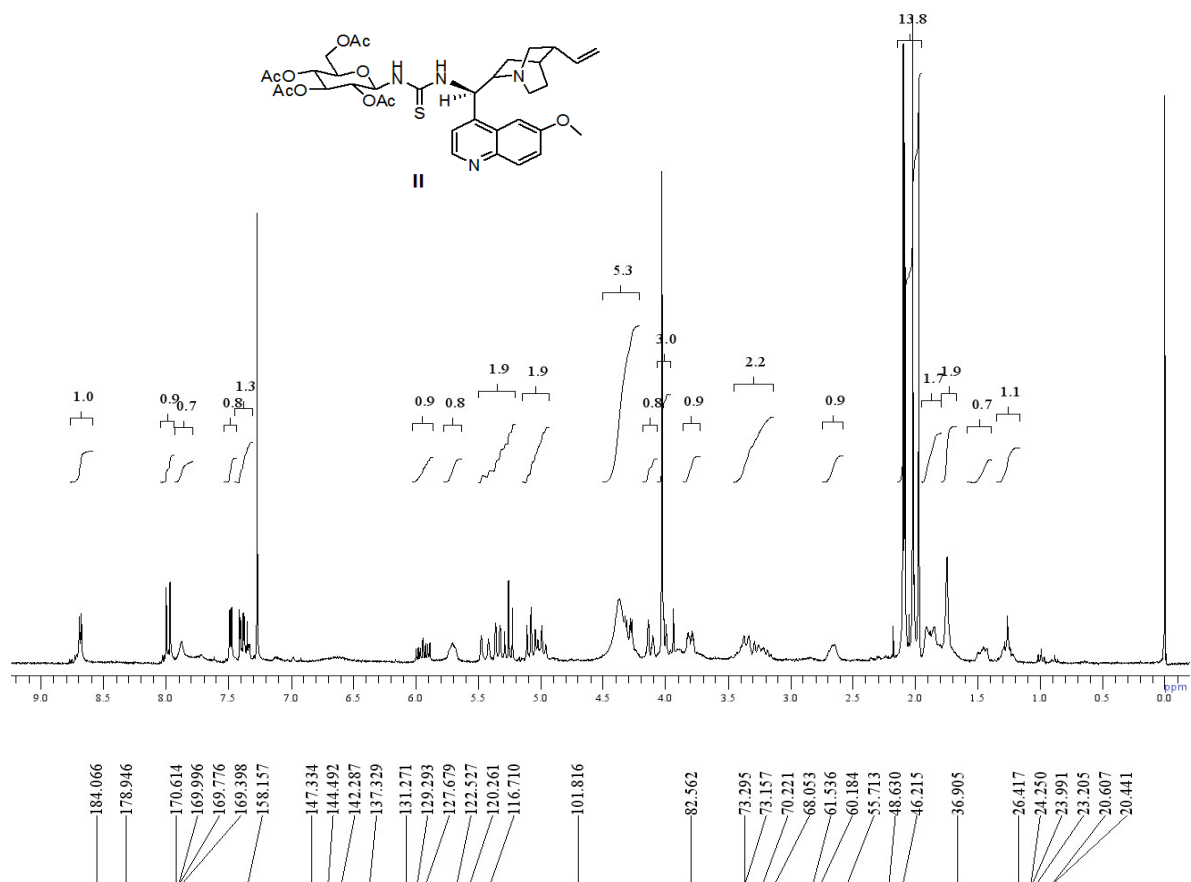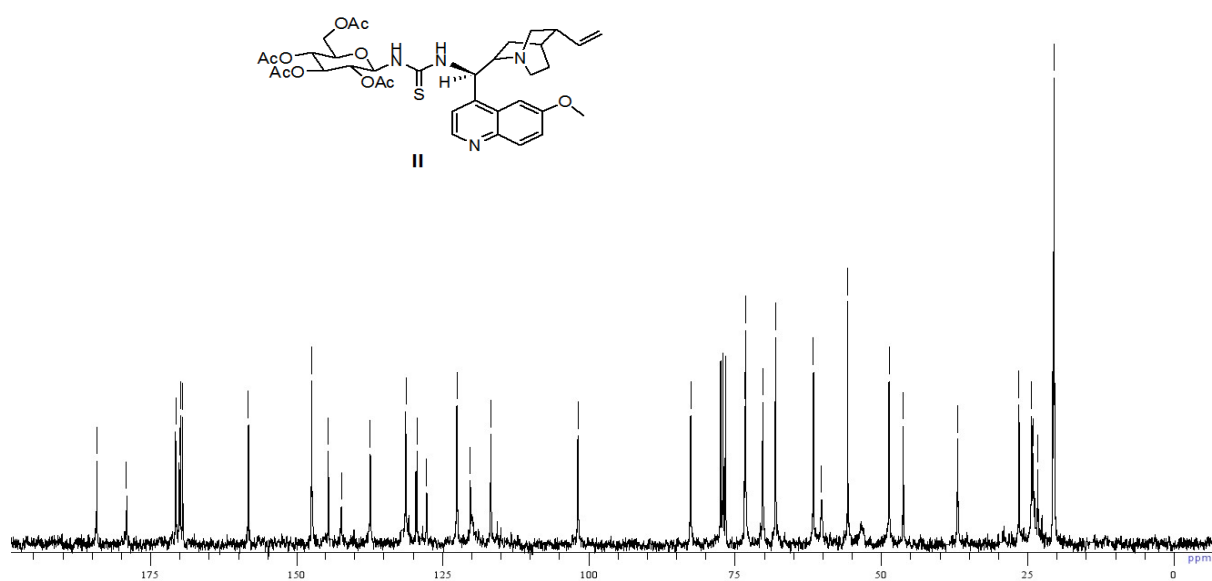

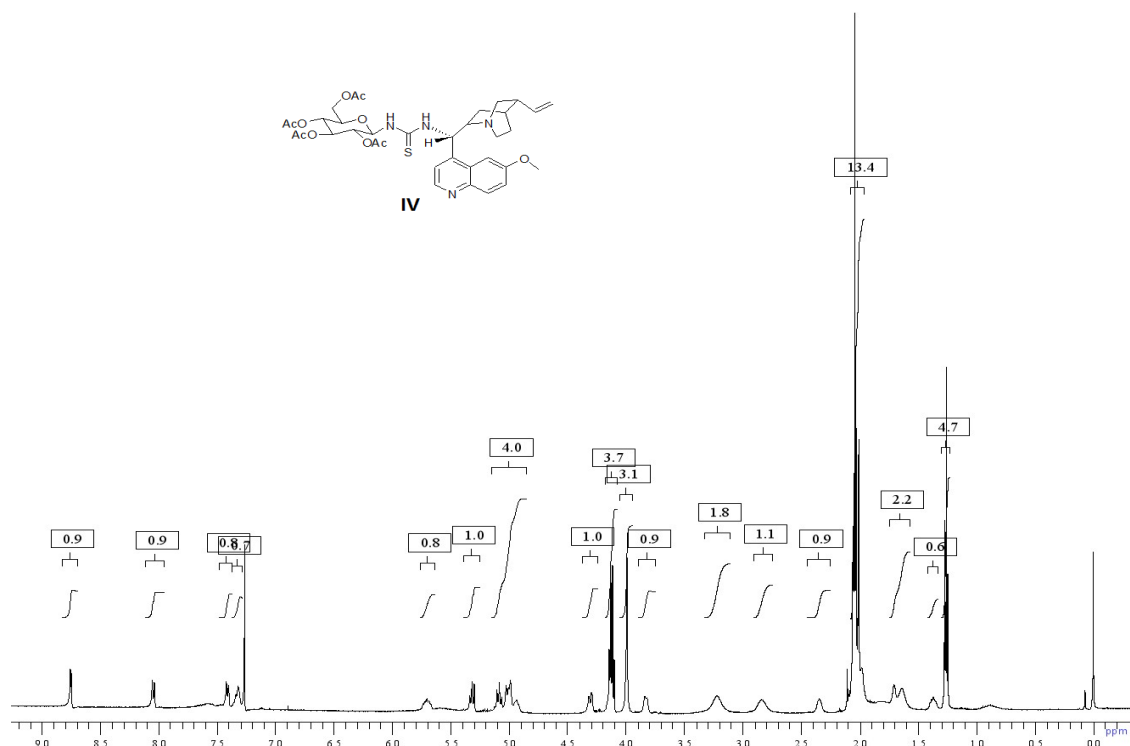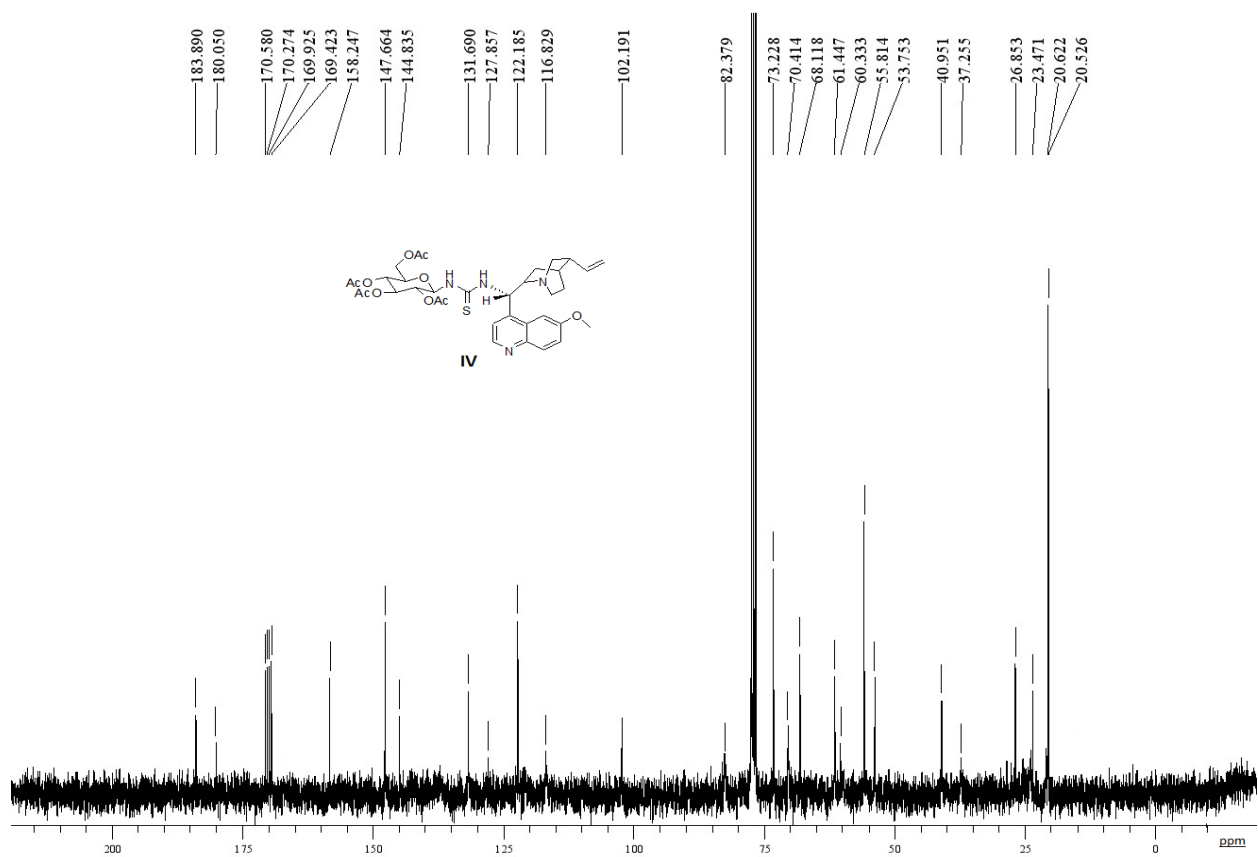

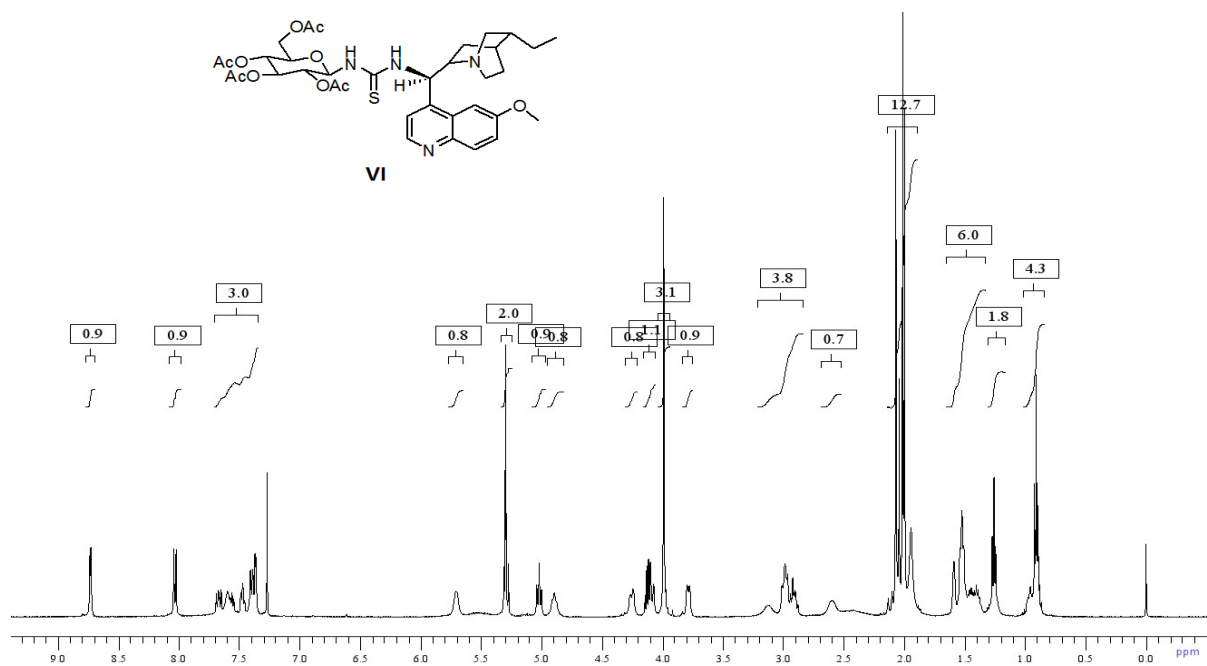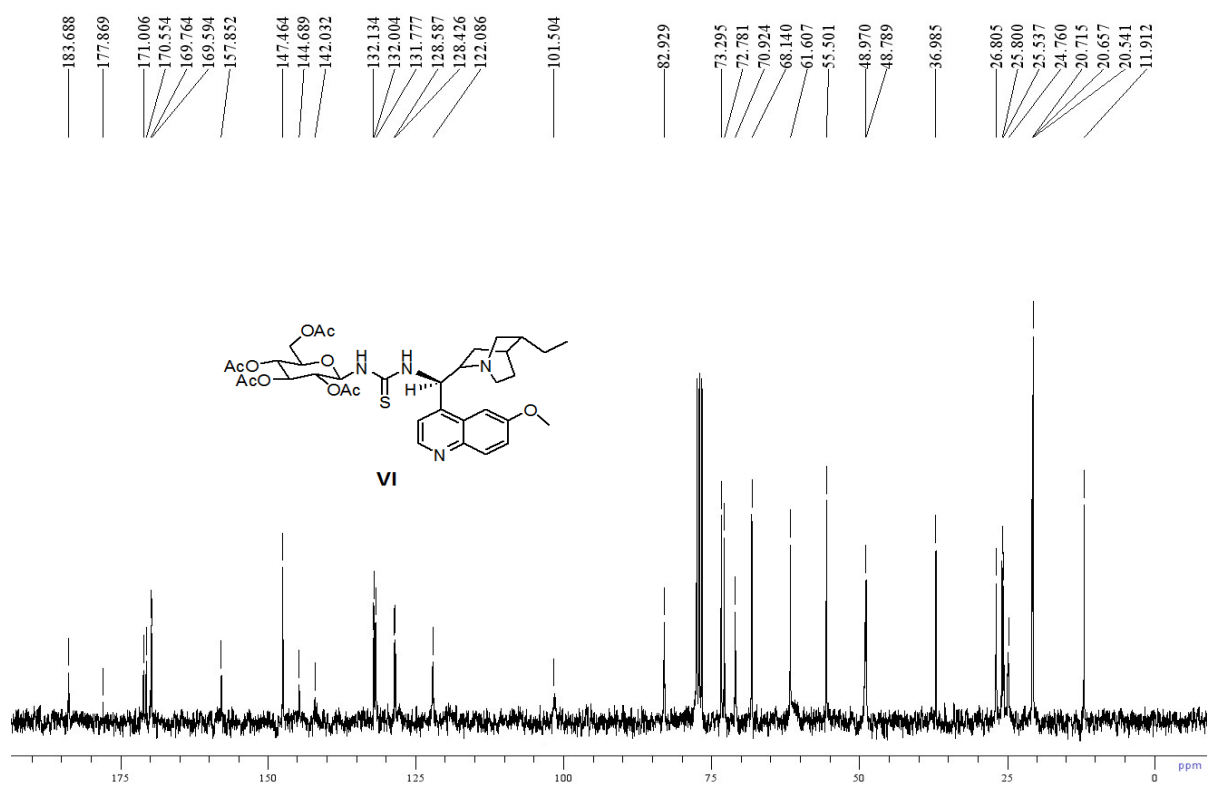

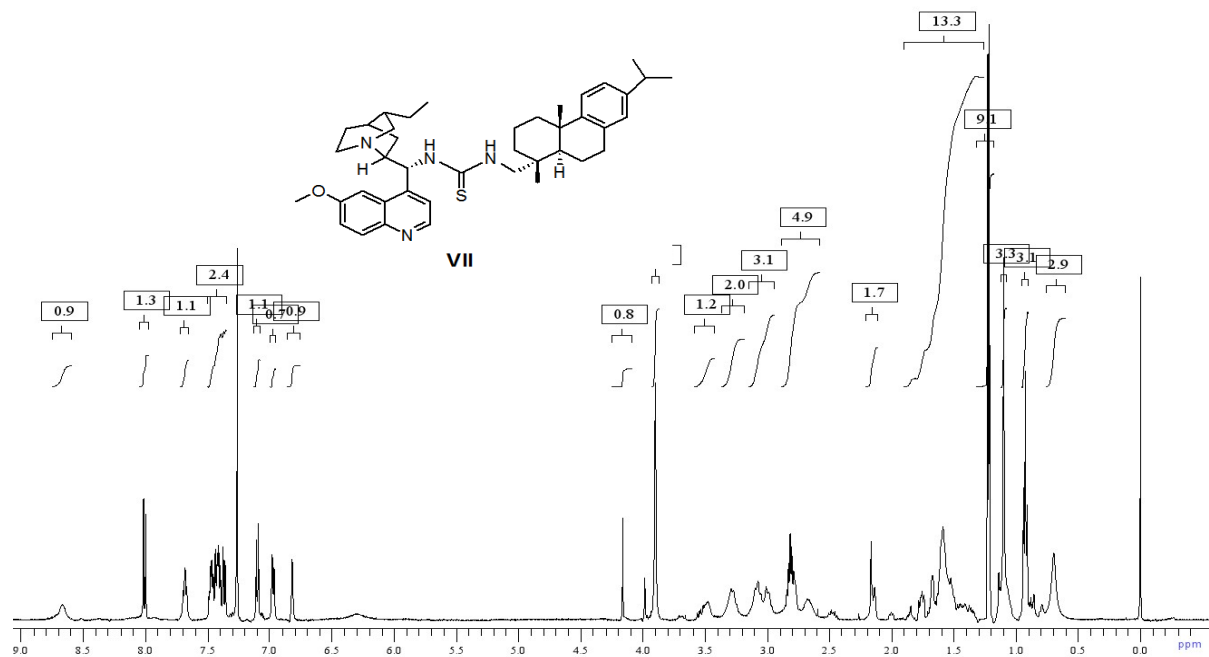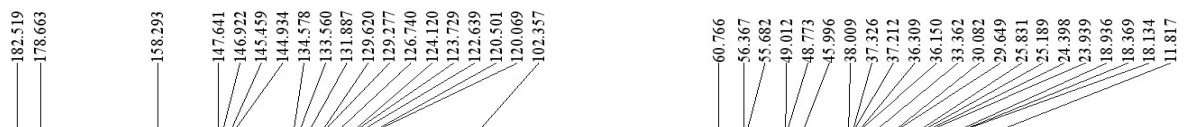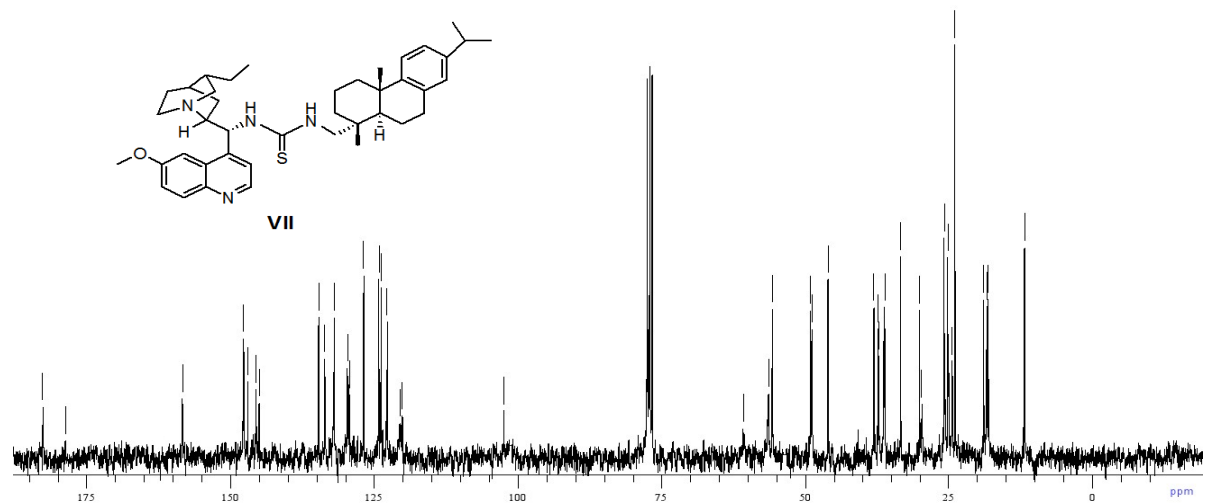

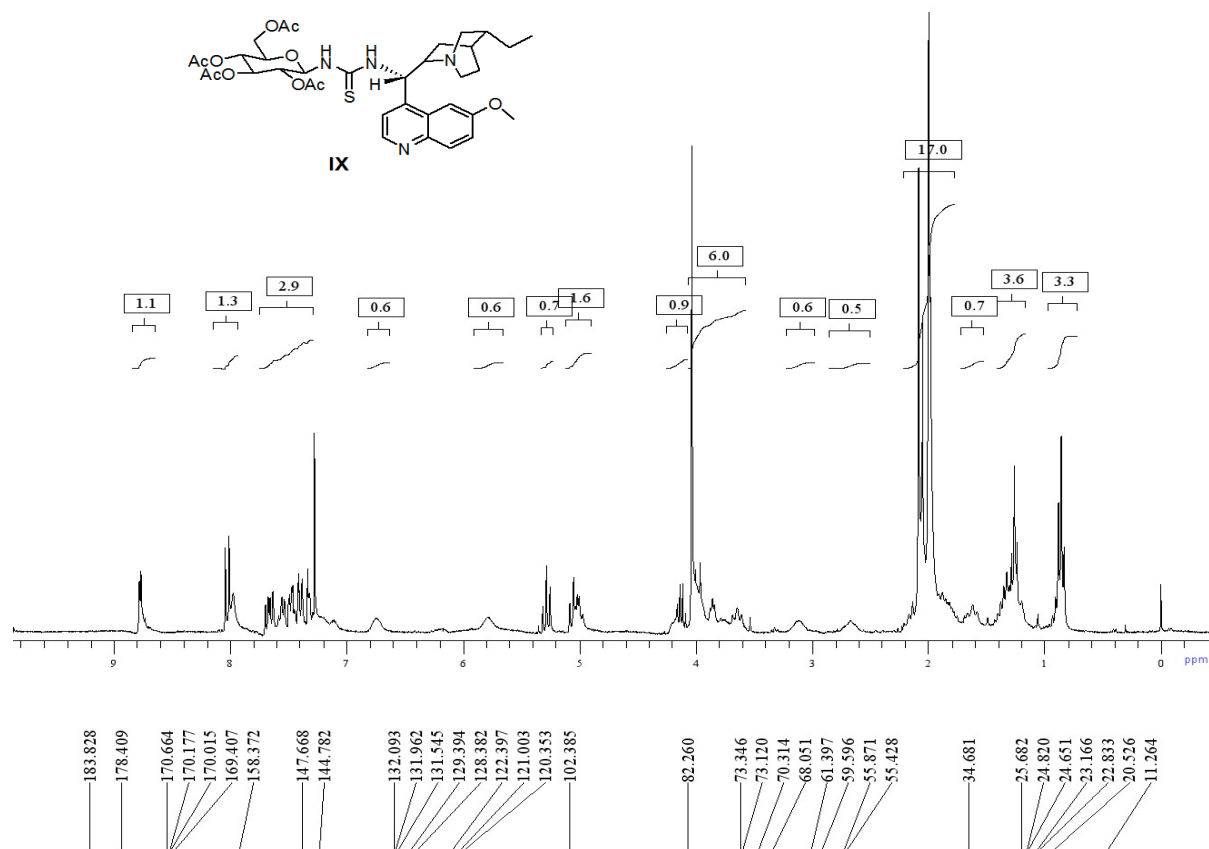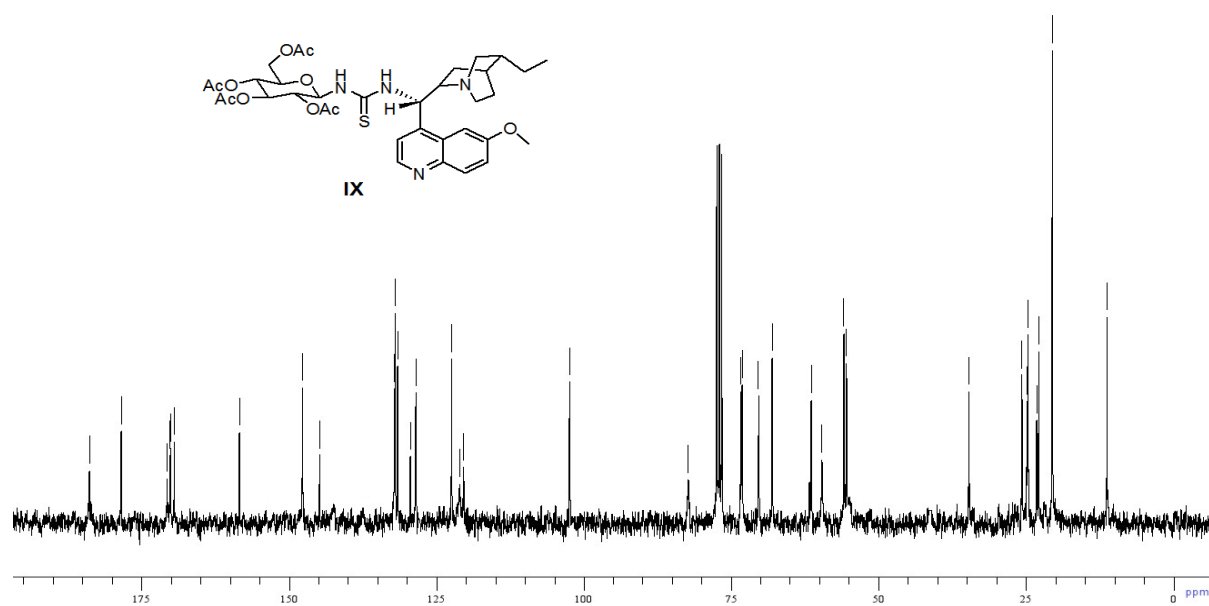

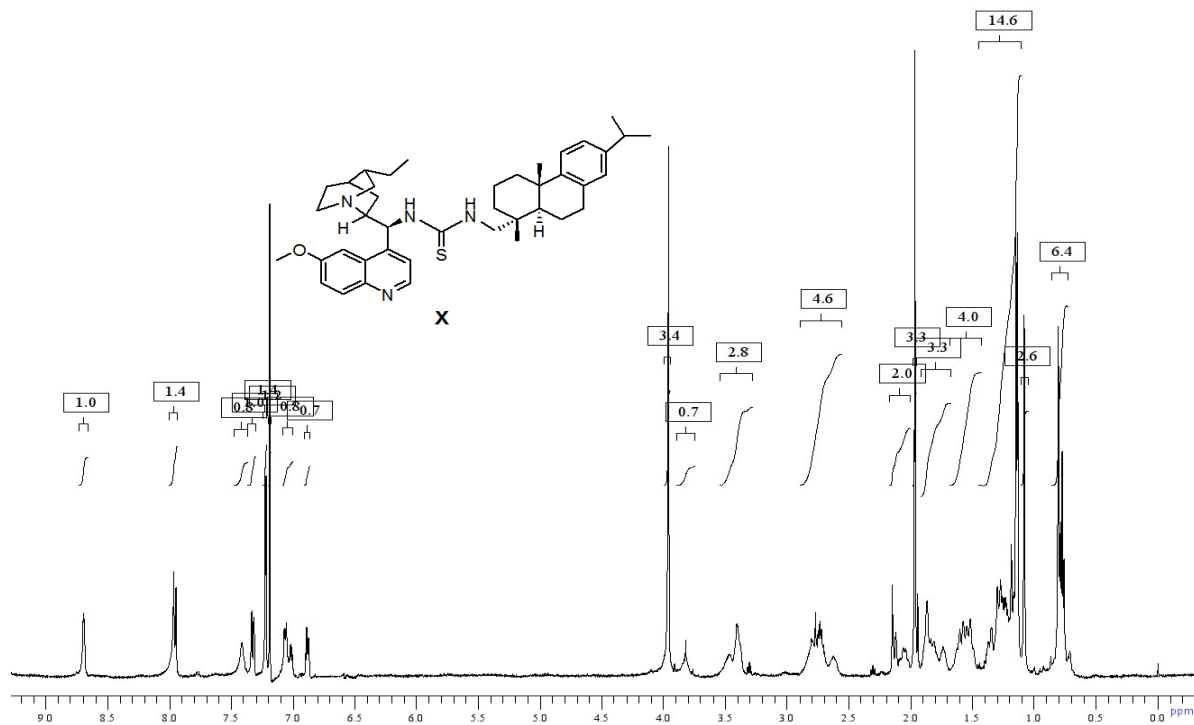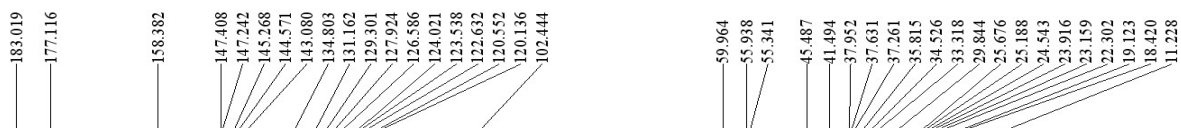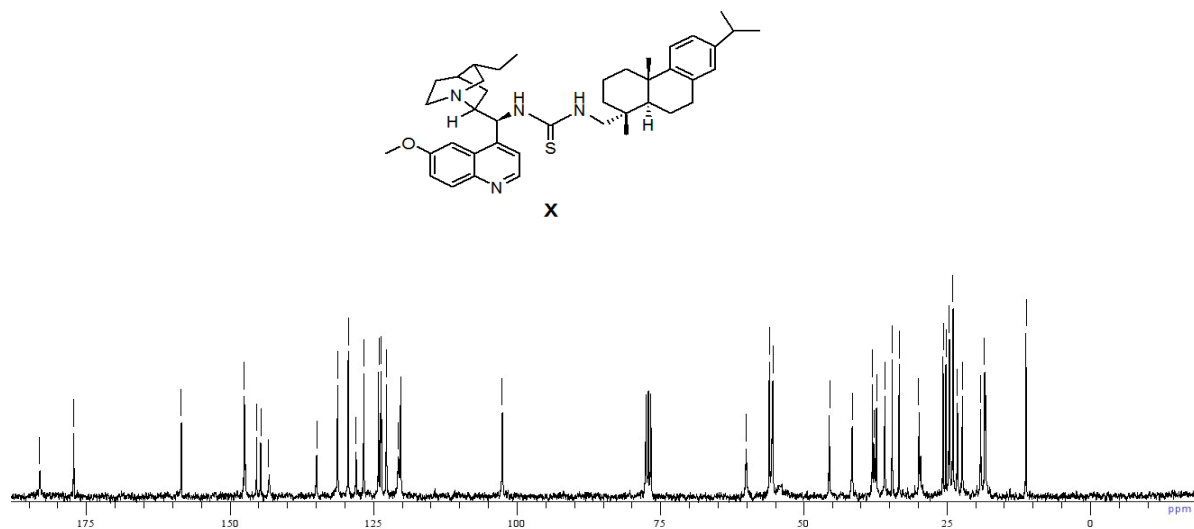



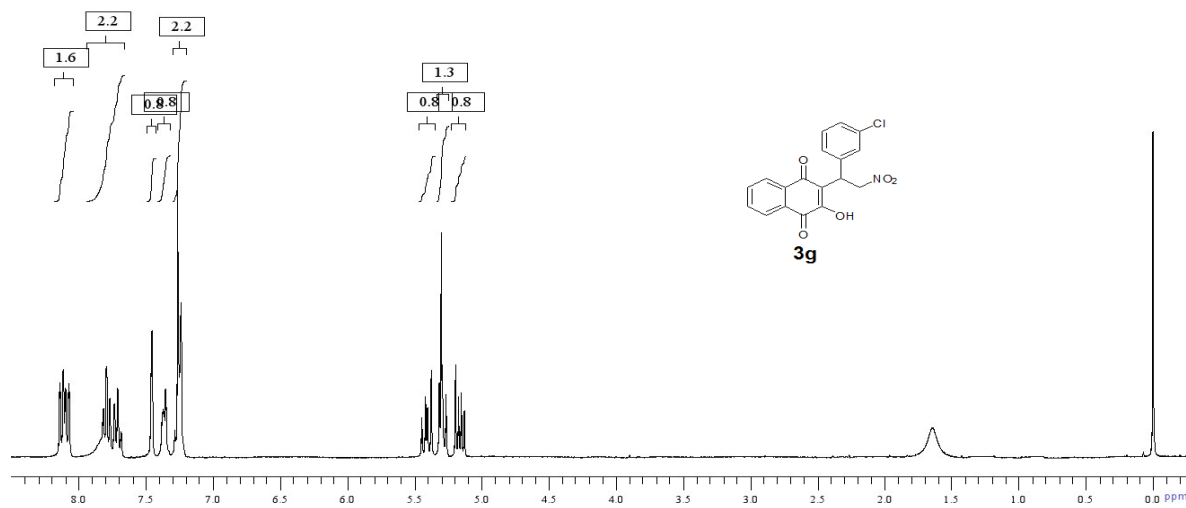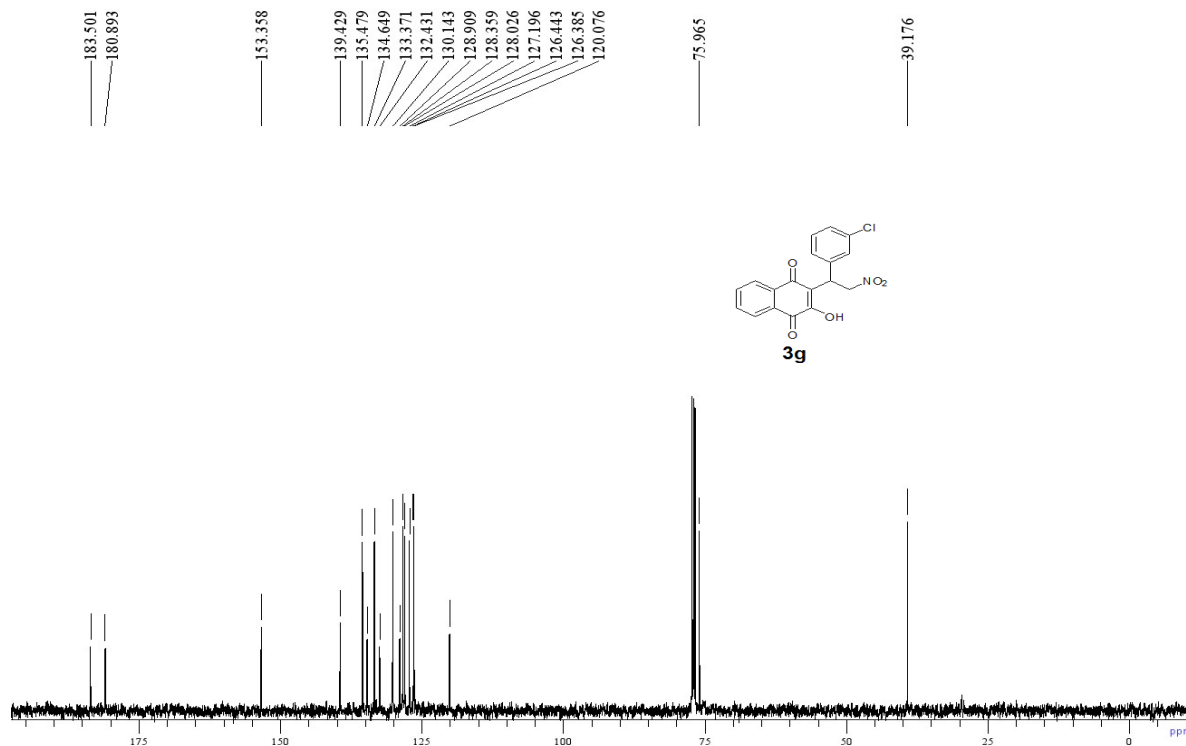

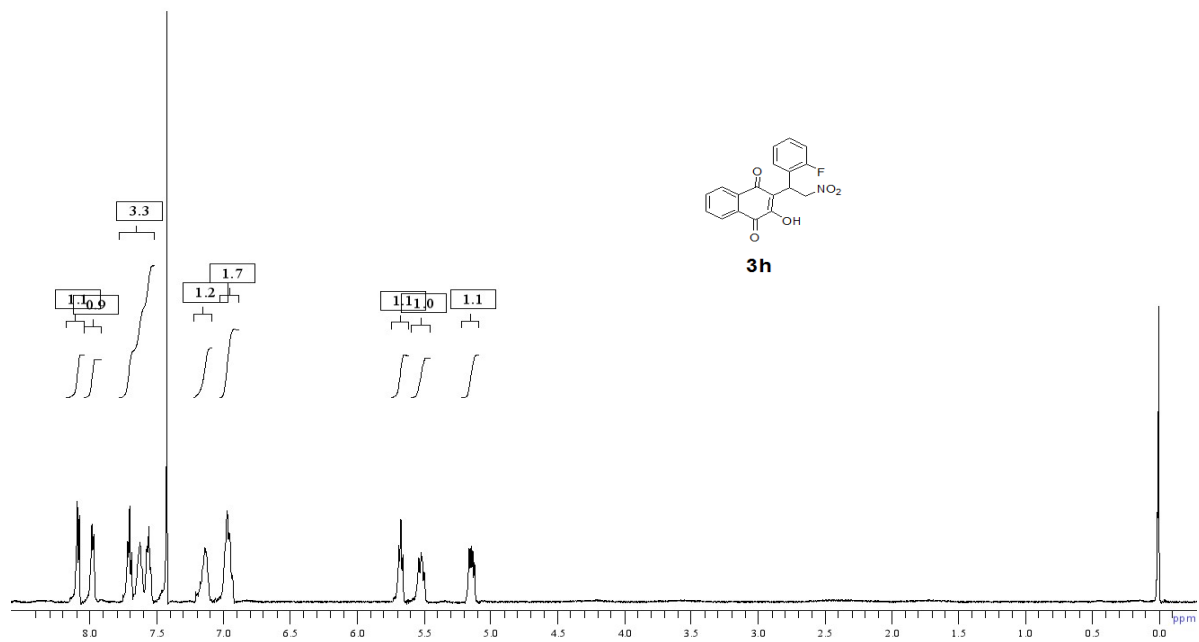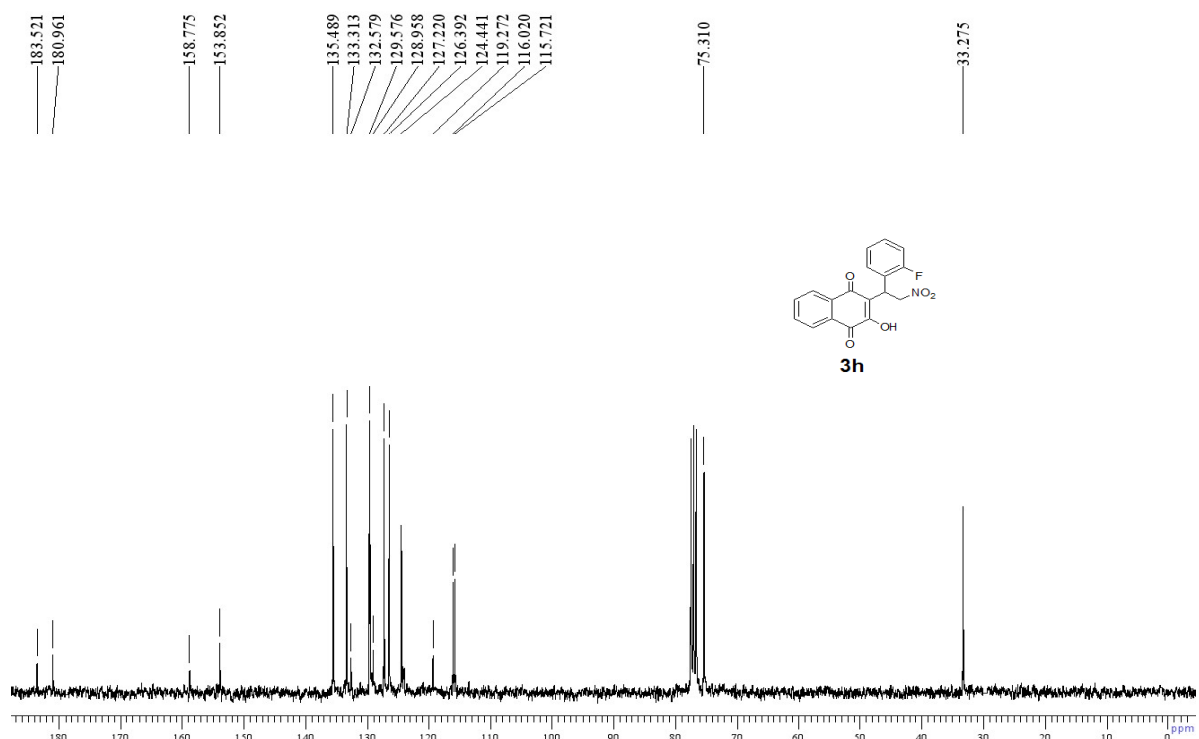

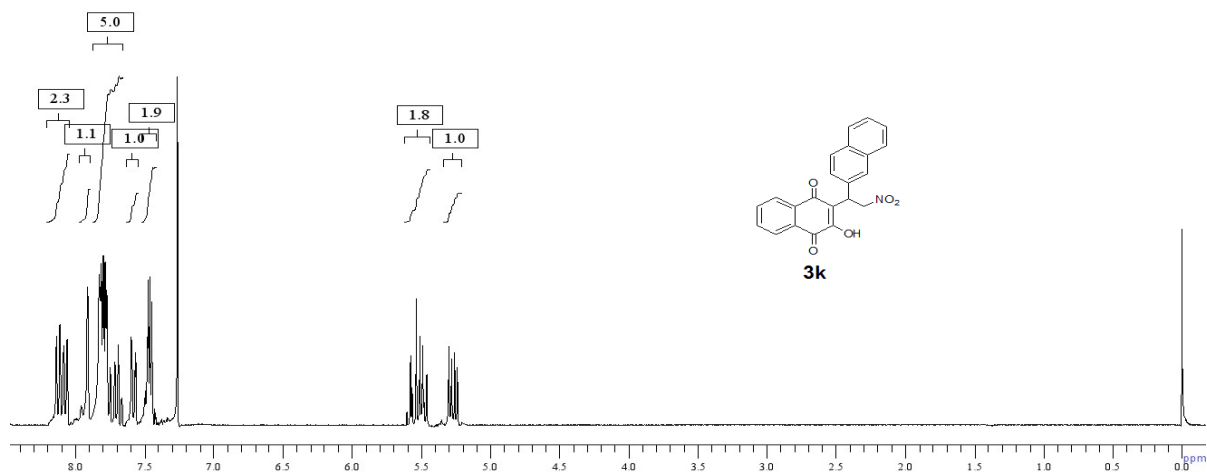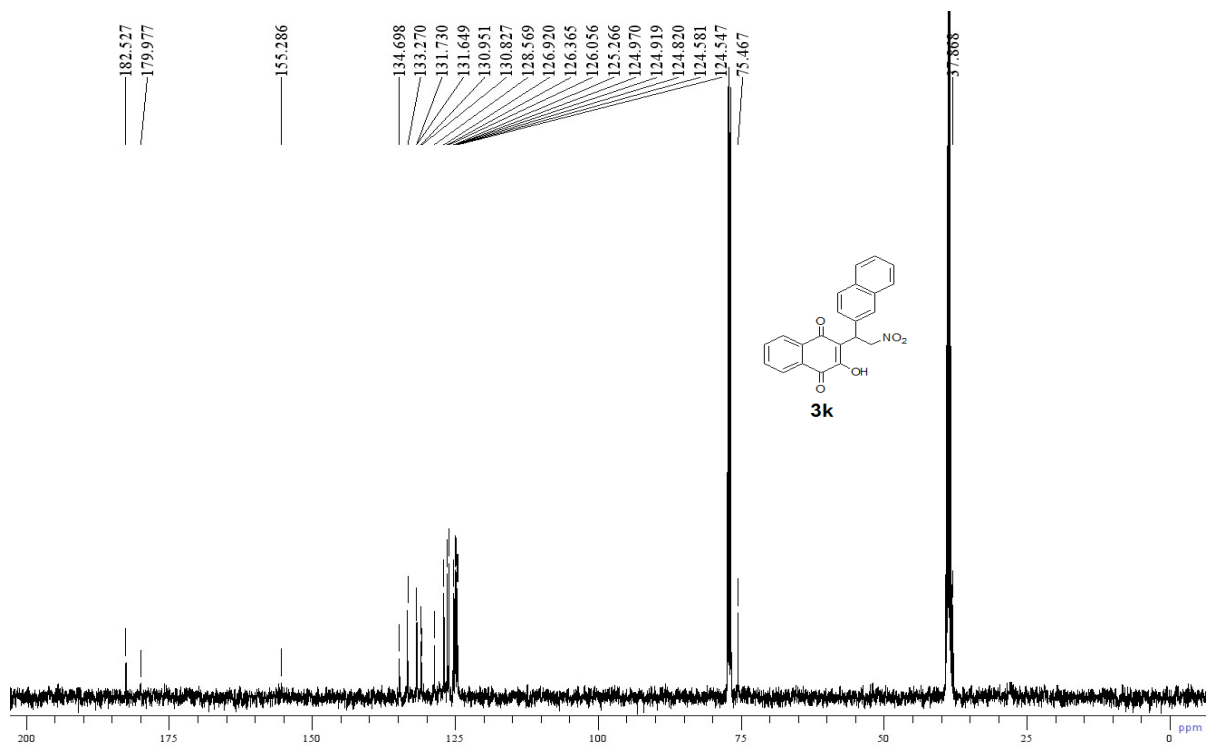

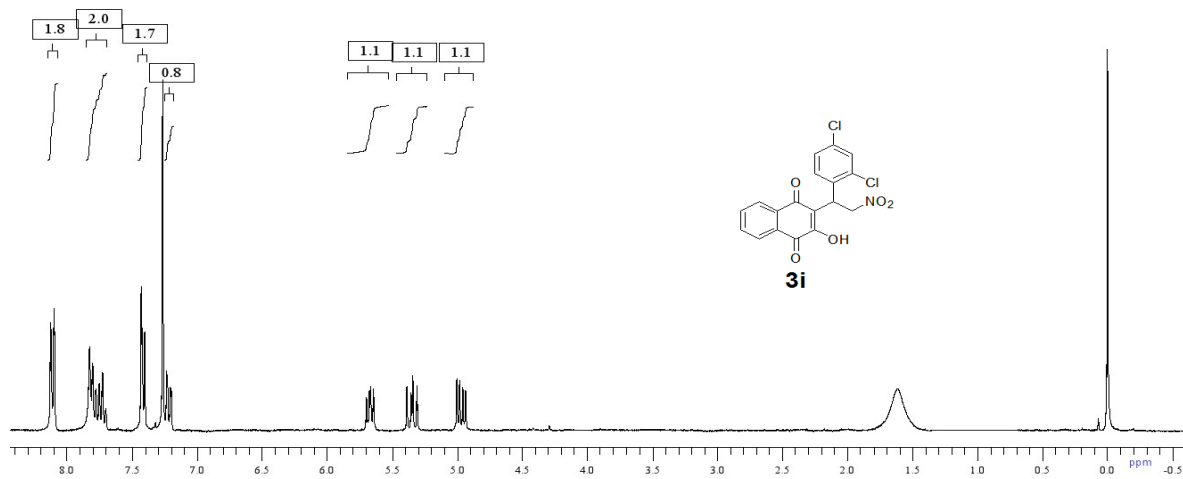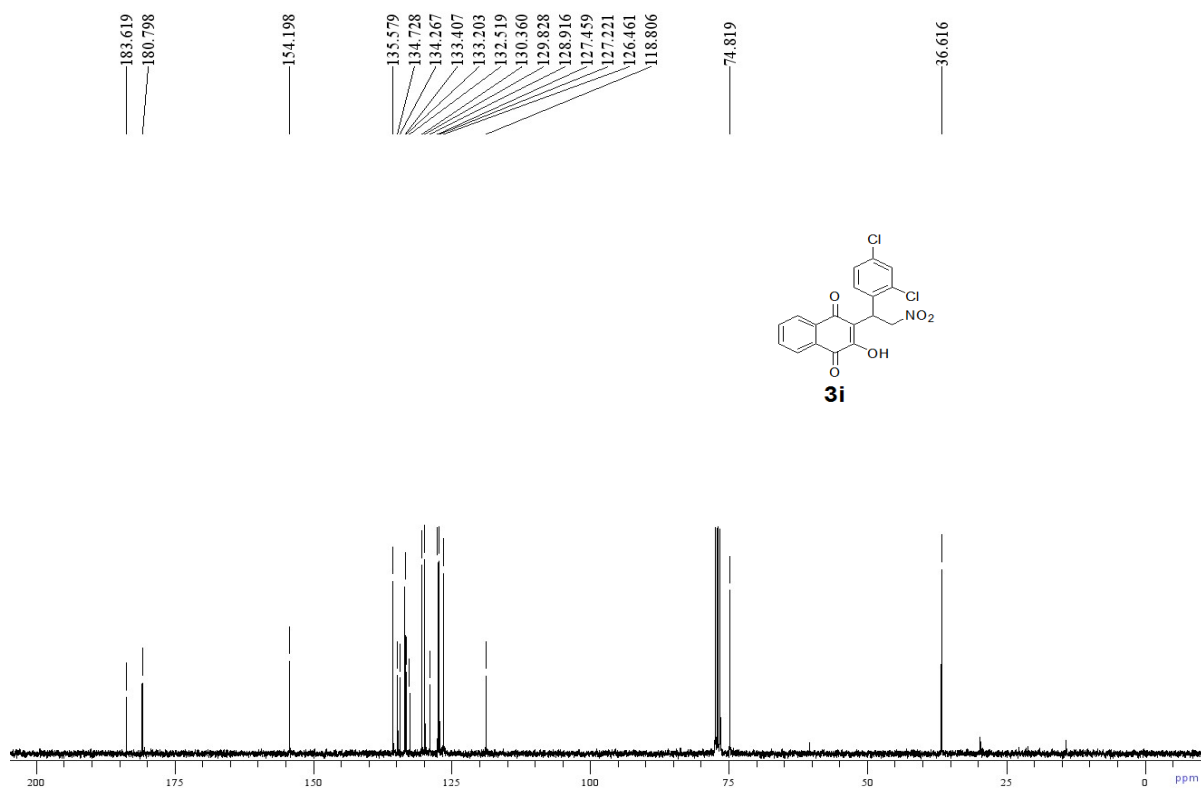

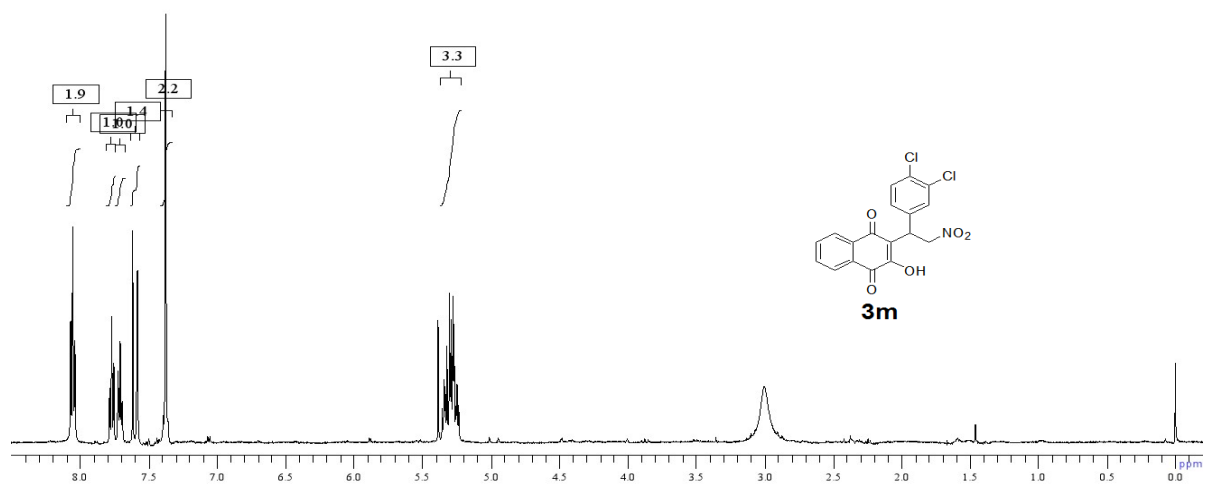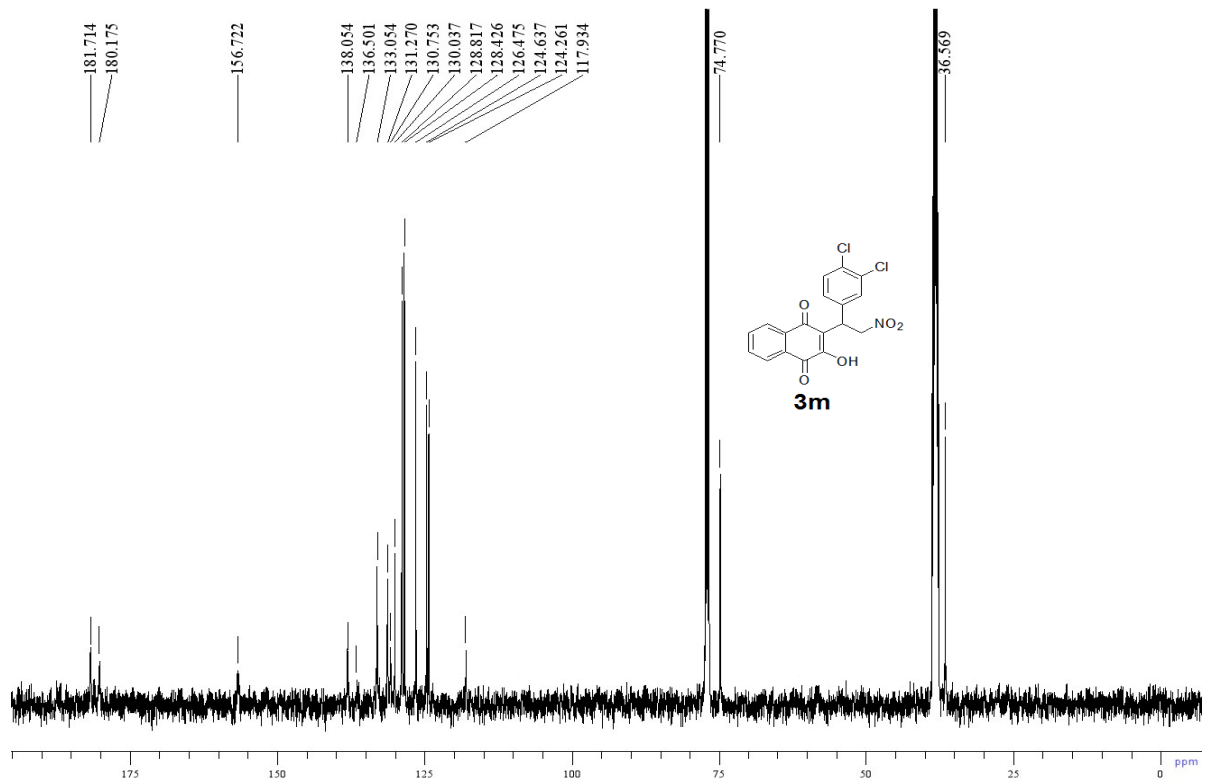

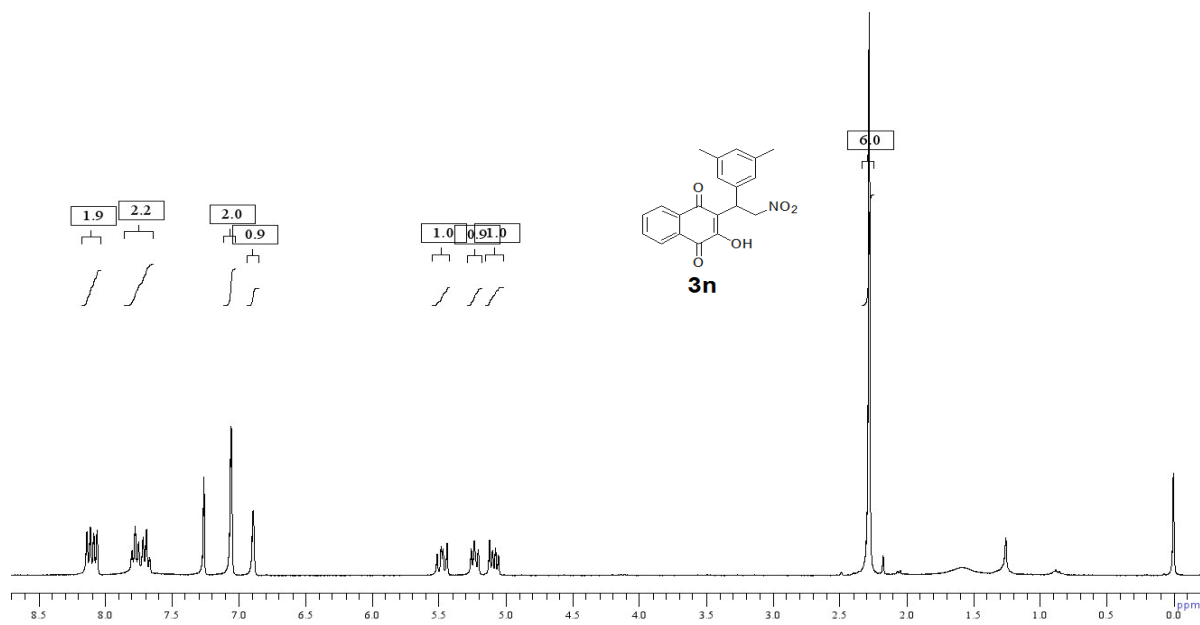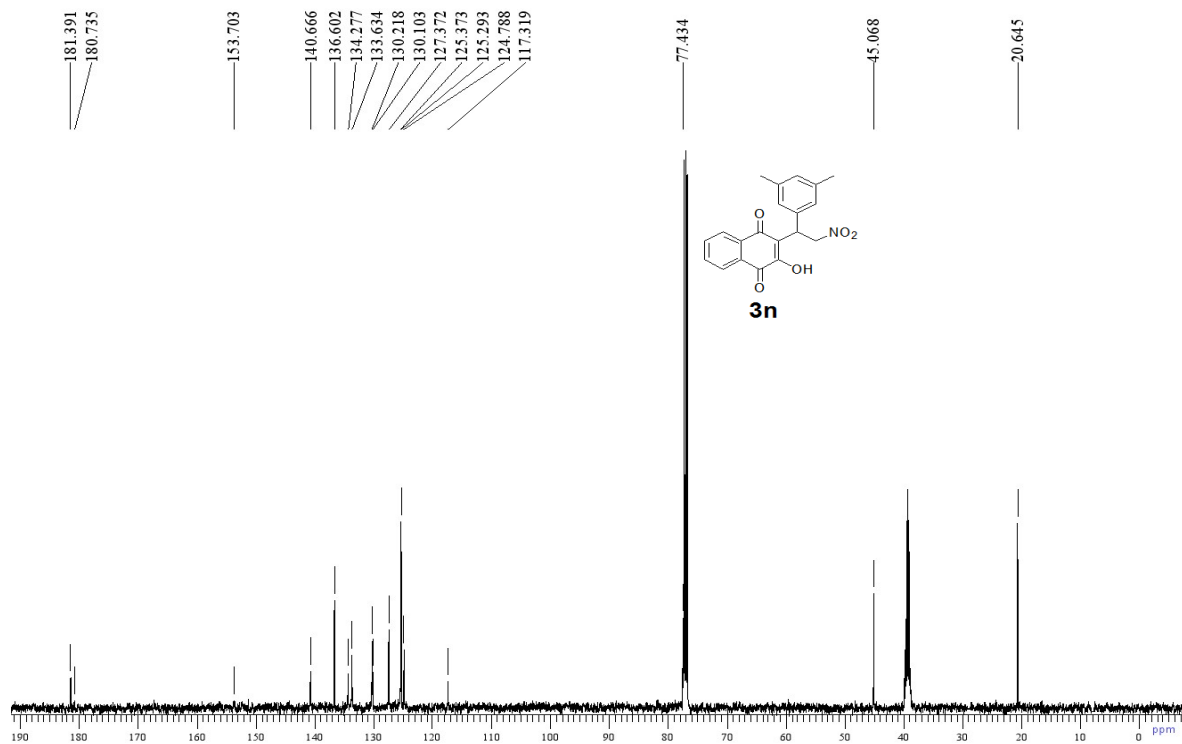

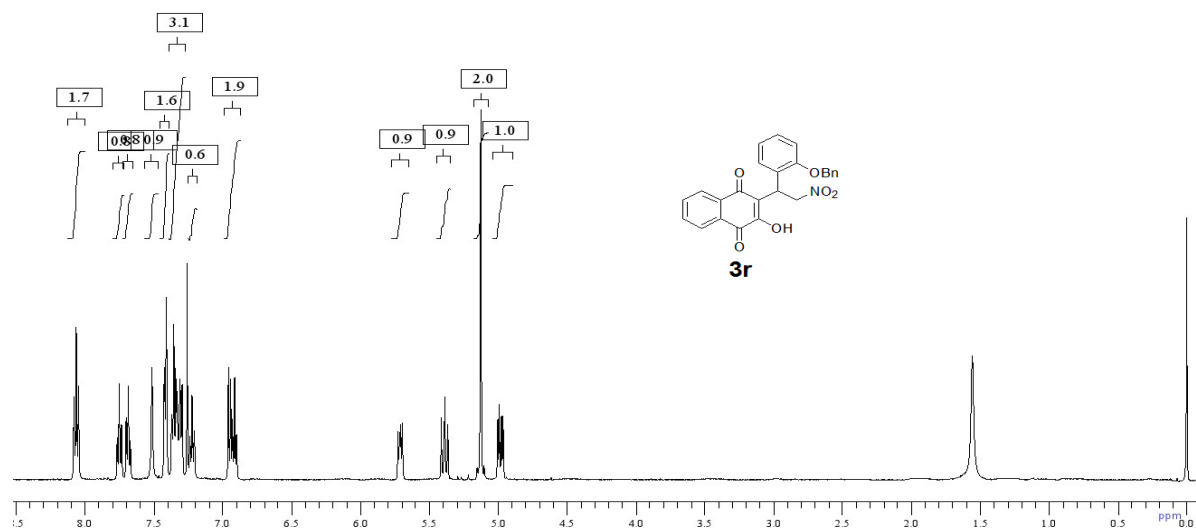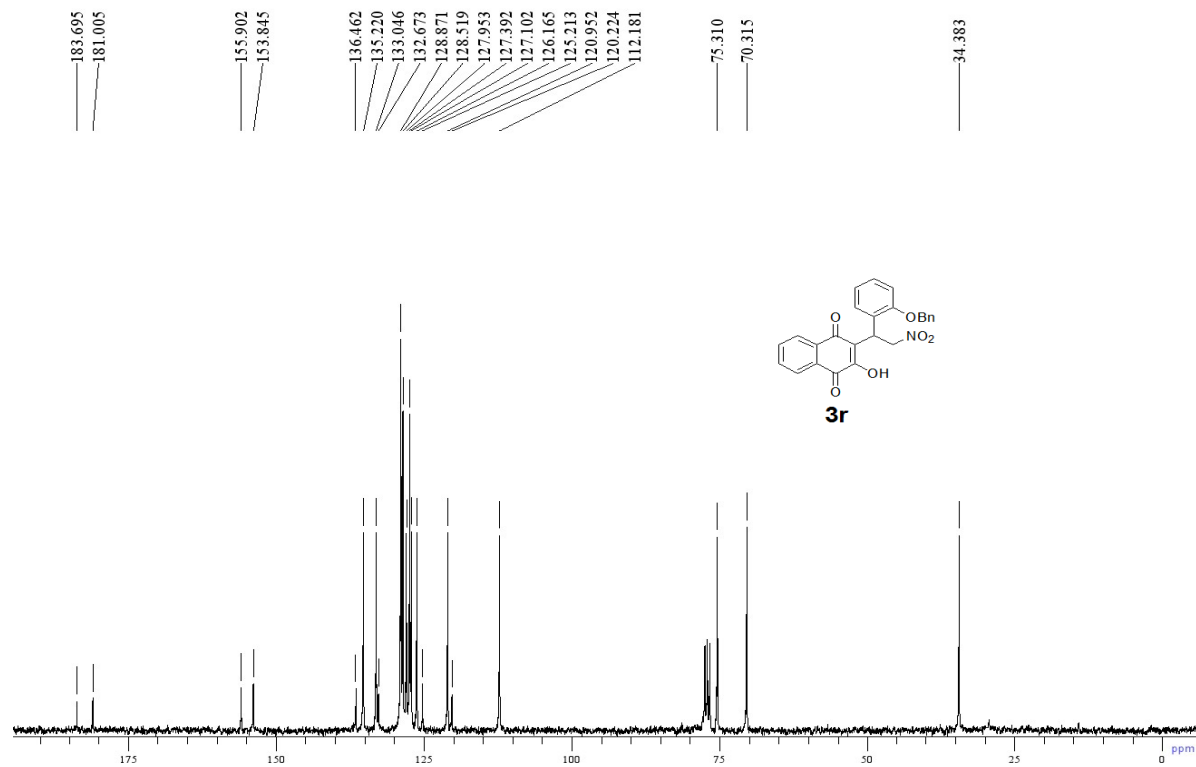

**2-hydroxy-3-(2-nitro-1-phenylethyl) naphthalene-1,4-dione(3a)**

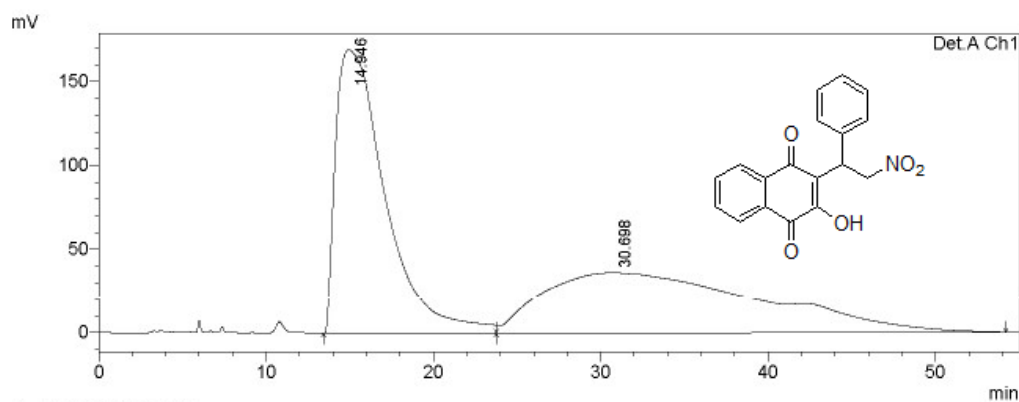

1 Det.A Ch1/254nm

PeakTable

Detector A Ch1 254nm

| Peak# | Ret. Time | Area     | Height | Area %  | Height % |
|-------|-----------|----------|--------|---------|----------|
| 1     | 14.946    | 34884086 | 169162 | 51.659  | 82.414   |
| 2     | 30.698    | 32643614 | 36096  | 48.341  | 17.586   |
| Total |           | 67527700 | 205259 | 100.000 | 100.000  |

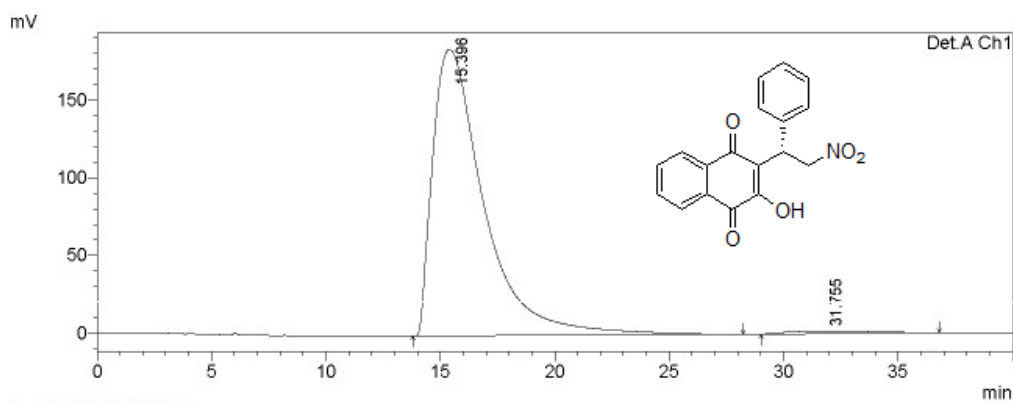

1 Det.A Ch1/254nm

PeakTable

Detector A Ch1 254nm

| Peak# | Ret. Time | Area     | Height | Area %  | Height % |
|-------|-----------|----------|--------|---------|----------|
| 1     | 15.396    | 28810127 | 184378 | 98.465  | 99.130   |
| 2     | 31.755    | 449020   | 1618   | 1.535   | 0.870    |
| Total |           | 29259147 | 185996 | 100.000 | 100.000  |



### 2-hydroxy-3-(2-nitro-1-p-tolyloethyl)naphthalene-1,4-dione(3b)

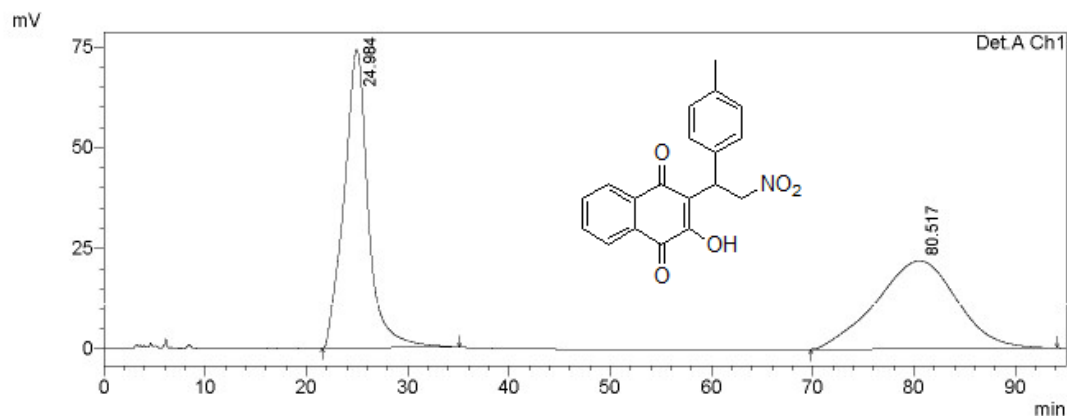

1 Det.A Ch1/254nm

PeakTable

Detector A Ch1 254nm

| Peak# | Ret. Time | Area     | Height | Area %  | Height % |
|-------|-----------|----------|--------|---------|----------|
| 1     | 24.984    | 12328123 | 74165  | 50.245  | 77.113   |
| 2     | 80.517    | 12208035 | 22012  | 49.755  | 22.887   |
| Total |           | 24536159 | 96177  | 100.000 | 100.000  |

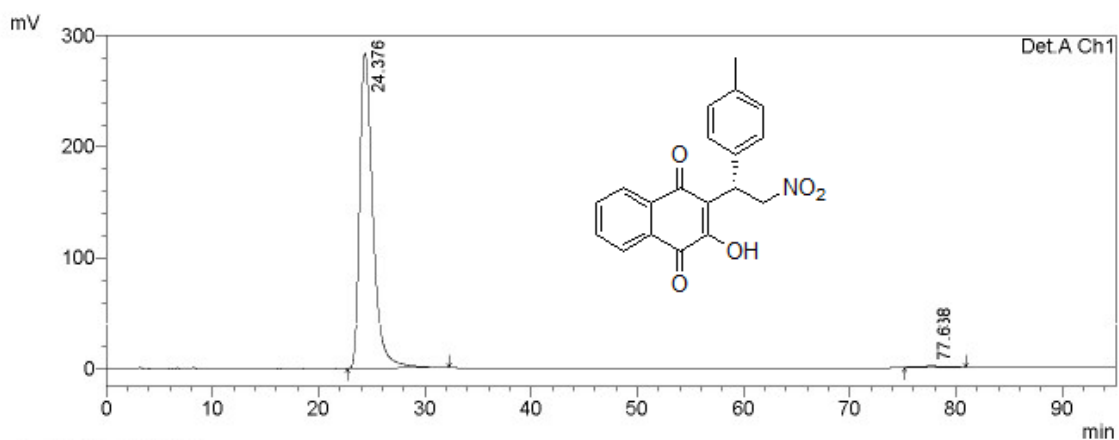

1 Det.A Ch1/254nm

PeakTable

Detector A Ch1 254nm

| Peak# | Ret. Time | Area     | Height | Area %  | Height % |
|-------|-----------|----------|--------|---------|----------|
| 1     | 24.376    | 24601812 | 283821 | 99.200  | 99.673   |
| 2     | 77.638    | 198491   | 931    | 0.800   | 0.327    |
| Total |           | 24800303 | 284752 | 100.000 | 100.000  |

### 2-hydroxy-3-(1-(4-methoxyphenyl)-2-nitroethyl)naphthalene-1,4-dione(3c)

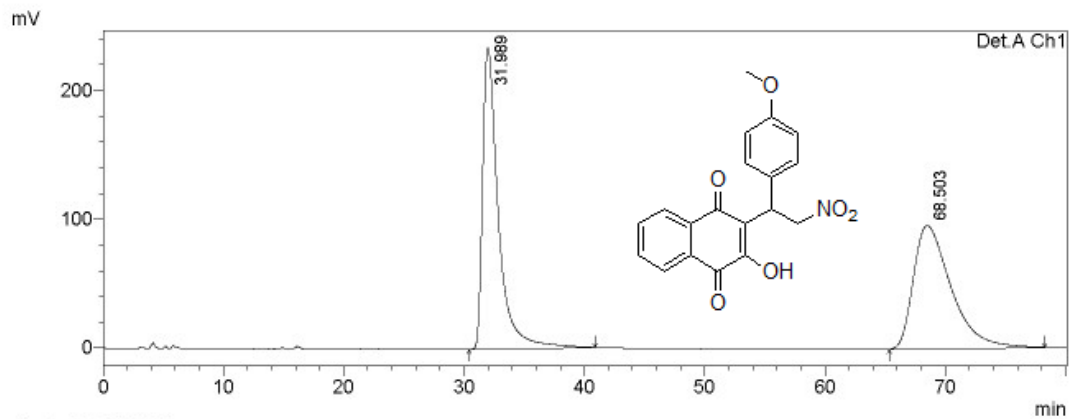

1 Det.A Ch1/254nm

PeakTable

Detector A Ch1 254nm

| Peak# | Ret. Time | Area     | Height | Area %  | Height % |
|-------|-----------|----------|--------|---------|----------|
| 1     | 31.989    | 21233825 | 233757 | 50.566  | 70.965   |
| 2     | 68.503    | 20758744 | 95639  | 49.434  | 29.035   |
| Total |           | 41992569 | 329396 | 100.000 | 100.000  |

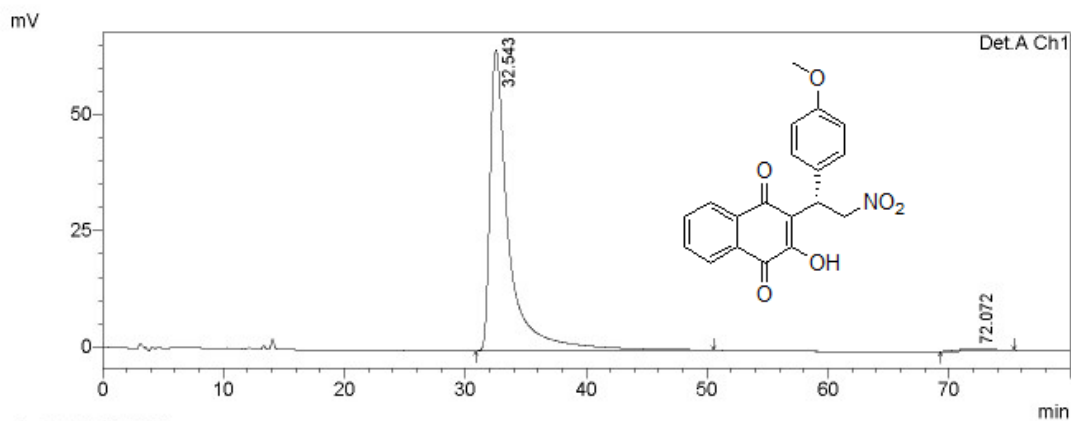

1 Det.A Ch1/254nm

PeakTable

Detector A Ch1 254nm

| Peak# | Ret. Time | Area    | Height | Area %  | Height % |
|-------|-----------|---------|--------|---------|----------|
| 1     | 32.543    | 6996264 | 64720  | 98.663  | 99.285   |
| 2     | 72.072    | 94789   | 466    | 1.337   | 0.715    |
| Total |           | 7091053 | 65186  | 100.000 | 100.000  |

### 2-(1-(4-fluorophenyl)-2-nitroethyl)-3-hydroxynaphthalene-1,4-dione(3d)

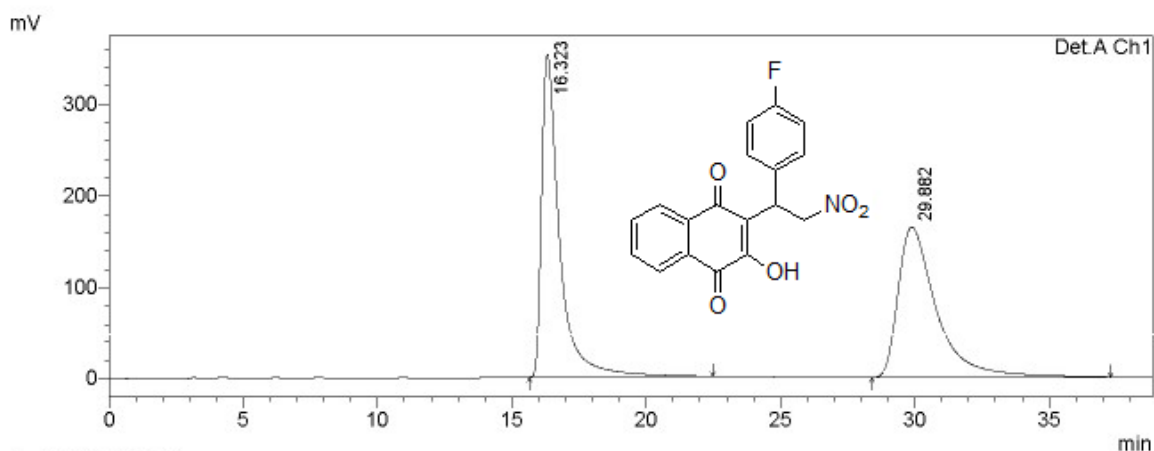

1 Det.A Ch1/254nm

PeakTable

Detector A Ch1 254nm

| Peak# | Ret. Time | Area     | Height | Area %  | Height % |
|-------|-----------|----------|--------|---------|----------|
| 1     | 16.323    | 16464943 | 352586 | 50.140  | 68.160   |
| 2     | 29.882    | 16373299 | 164706 | 49.860  | 31.840   |
| Total |           | 32838241 | 517293 | 100.000 | 100.000  |

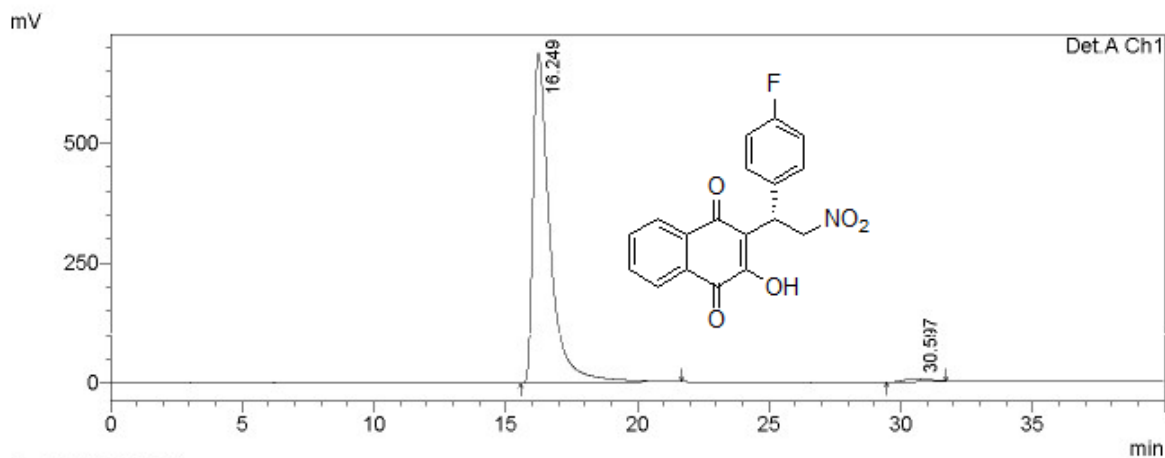

1 Det.A Ch1/254nm

PeakTable

Detector A Ch1 254nm

| Peak# | Ret. Time | Area     | Height | Area %  | Height % |
|-------|-----------|----------|--------|---------|----------|
| 1     | 16.249    | 30842933 | 687657 | 98.628  | 99.155   |
| 2     | 30.597    | 429011   | 5862   | 1.372   | 0.845    |
| Total |           | 31271945 | 693519 | 100.000 | 100.000  |

## 2-(1-(4-chlorophenyl)-2-nitroethyl)-3-hydroxynaphthalene-1,4-dione(3e)

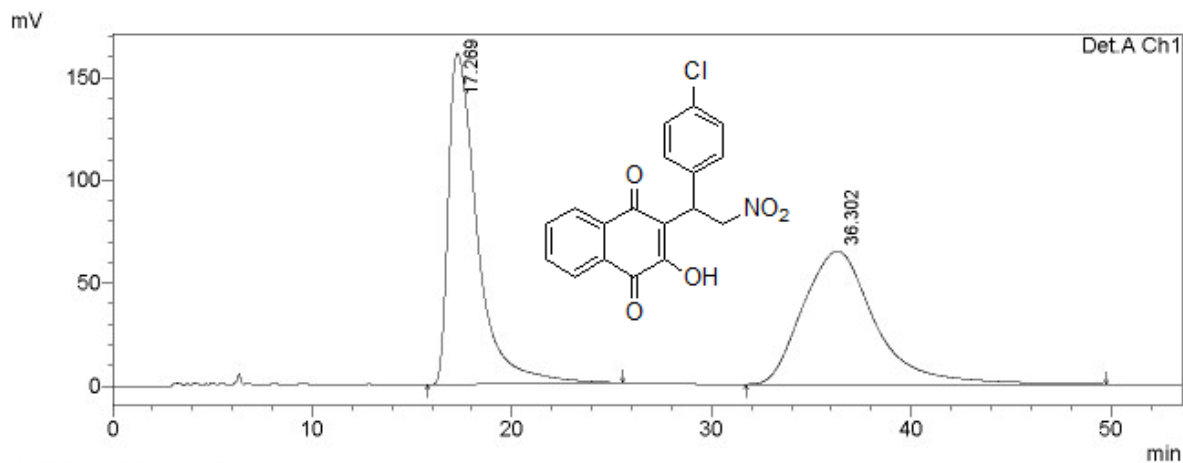

1 Det.A Ch1/254nm

PeakTable

Detector A Ch1 254nm

| Peak# | Ret. Time | Area     | Height | Area %  | Height % |
|-------|-----------|----------|--------|---------|----------|
| 1     | 17.269    | 16223474 | 161149 | 49.946  | 71.332   |
| 2     | 36.302    | 16258822 | 64766  | 50.054  | 28.668   |
| Total |           | 32482296 | 225915 | 100.000 | 100.000  |

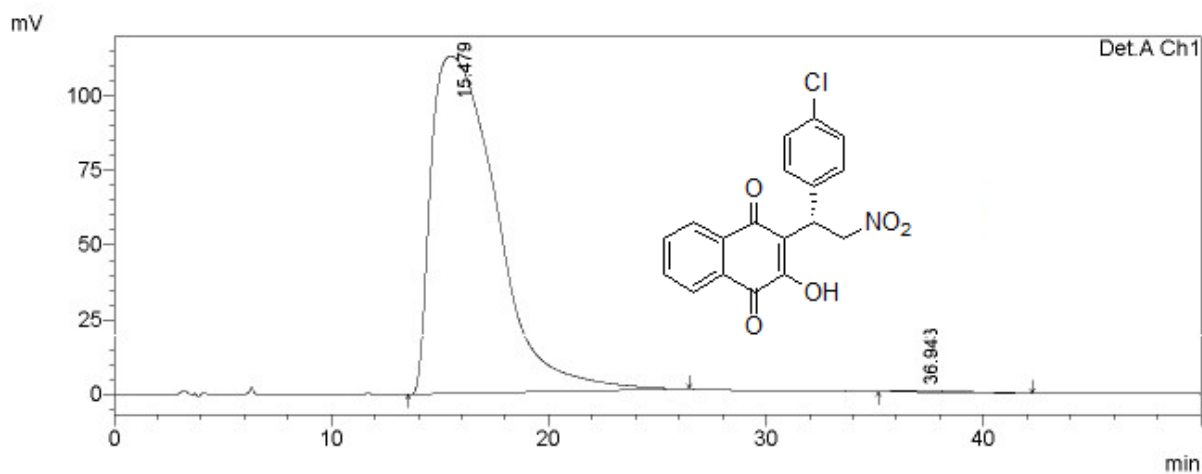

1 Det.A Ch1/254nm

PeakTable

Detector A Ch1 254nm

| Peak# | Ret. Time | Area     | Height | Area %  | Height % |
|-------|-----------|----------|--------|---------|----------|
| 1     | 15.479    | 23828274 | 113209 | 99.689  | 99.647   |
| 2     | 36.943    | 74275    | 401    | 0.311   | 0.353    |
| Total |           | 23902549 | 113610 | 100.000 | 100.000  |

### 2-(1-(4-bromophenyl)-2-nitroethyl)-3-hydroxynaphthalene-1,4-dione(3f)

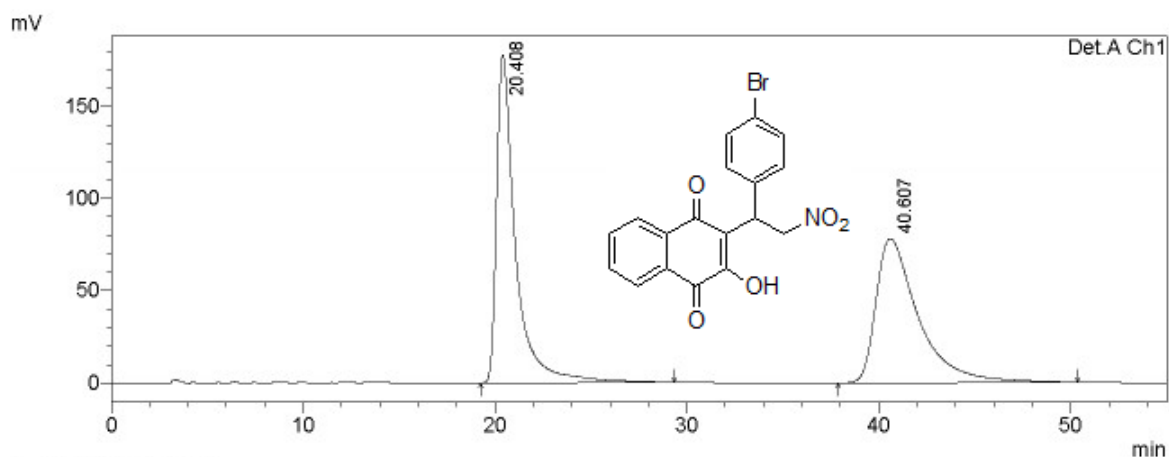

1 Det.A Ch1/254nm

PeakTable

Detector A Ch1 254nm

| Peak# | Ret. Time | Area     | Height | Area %  | Height % |
|-------|-----------|----------|--------|---------|----------|
| 1     | 20.408    | 12195114 | 177723 | 50.534  | 69.502   |
| 2     | 40.607    | 11937353 | 77984  | 49.466  | 30.498   |
| Total |           | 24132467 | 255707 | 100.000 | 100.000  |

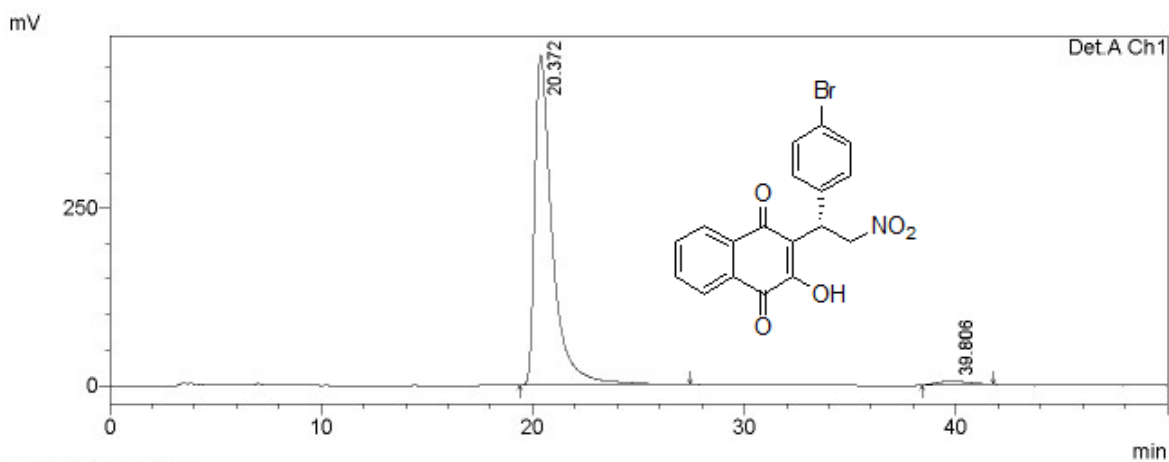

1 Det.A Ch1/254nm

PeakTable

Detector A Ch1 254nm

| Peak# | Ret. Time | Area     | Height | Area %  | Height % |
|-------|-----------|----------|--------|---------|----------|
| 1     | 20.372    | 26932963 | 465995 | 98.049  | 98.943   |
| 2     | 39.806    | 535931   | 4980   | 1.951   | 1.057    |
| Total |           | 27468894 | 470975 | 100.000 | 100.000  |

### 2-(1-(3-chlorophenyl)-2-nitroethyl)-3-hydroxynaphthalene-1,4-dione(3g)

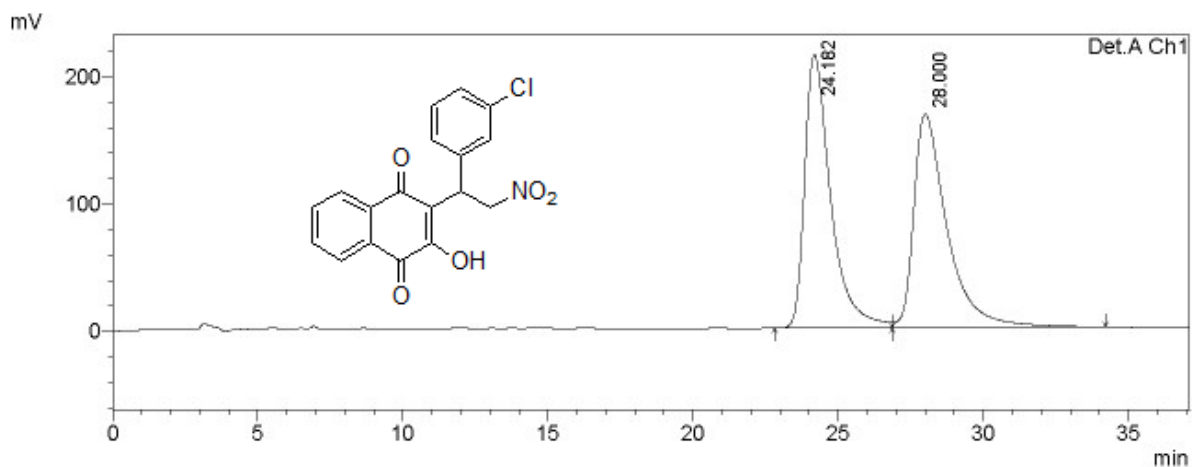

1 Det.A Ch1/254nm

PeakTable

Detector A Ch1 254nm

| Peak# | Ret. Time | Area     | Height | Area %  | Height % |
|-------|-----------|----------|--------|---------|----------|
| 1     | 24.182    | 13403761 | 215132 | 49.968  | 56.145   |
| 2     | 28.000    | 13420755 | 168039 | 50.032  | 43.855   |
| Total |           | 26824516 | 383170 | 100.000 | 100.000  |

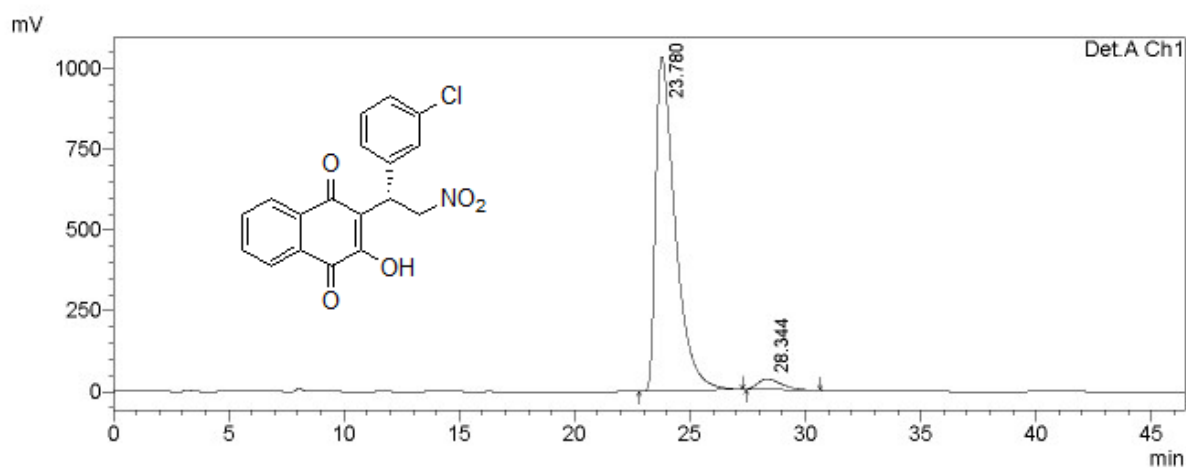

1 Det.A Ch1/254nm

PeakTable

Detector A Ch1 254nm

| Peak# | Ret. Time | Area     | Height  | Area %  | Height % |
|-------|-----------|----------|---------|---------|----------|
| 1     | 23.780    | 61267441 | 1035216 | 96.324  | 96.957   |
| 2     | 28.344    | 2338349  | 32490   | 3.676   | 3.043    |
| Total |           | 63605790 | 1067707 | 100.000 | 100.000  |

### 2-(1-(2-fluorophenyl)-2-nitroethyl)-3-hydroxynaphthalene-1,4-dione(3h)

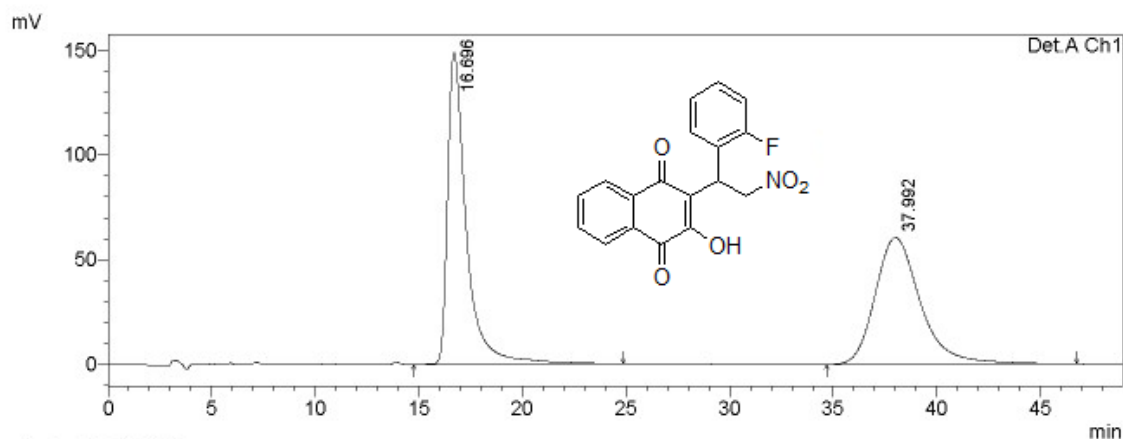

1 Det.A Ch1/254nm

PeakTable

Detector A Ch1 254nm

| Peak# | Ret. Time | Area     | Height | Area %  | Height % |
|-------|-----------|----------|--------|---------|----------|
| 1     | 16.696    | 9389216  | 148939 | 50.494  | 71.166   |
| 2     | 37.992    | 9205430  | 60346  | 49.506  | 28.834   |
| Total |           | 18594646 | 209285 | 100.000 | 100.000  |

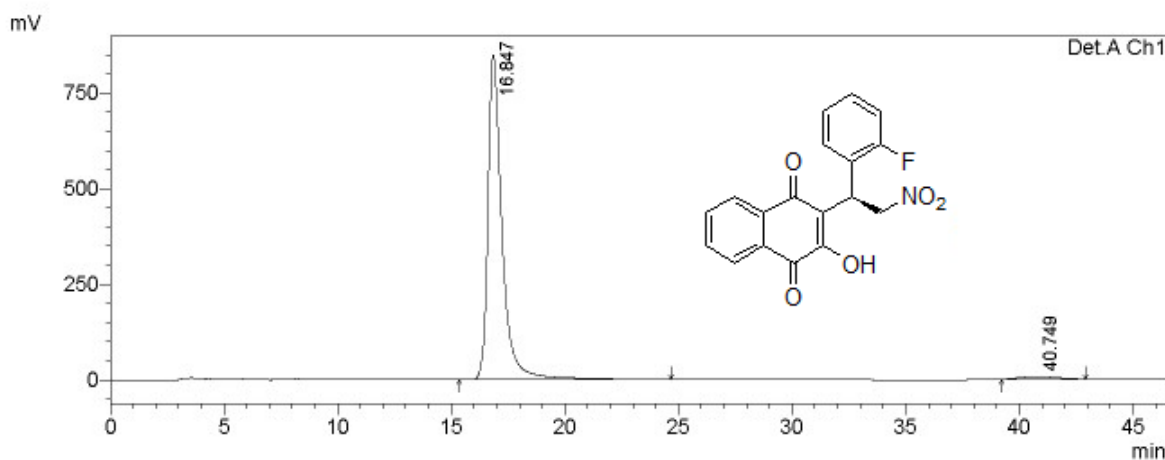

1 Det.A Ch1/254nm

PeakTable

Detector A Ch1 254nm

| Peak# | Ret. Time | Area     | Height | Area %  | Height % |
|-------|-----------|----------|--------|---------|----------|
| 1     | 16.847    | 36703377 | 849391 | 97.857  | 99.172   |
| 2     | 40.749    | 803600   | 7092   | 2.143   | 0.828    |
| Total |           | 37506976 | 856483 | 100.000 | 100.000  |

## 2-(1-(2-chlorophenyl)-2-nitroethyl)-3-hydroxynaphthalene-1,4-dione(3i)

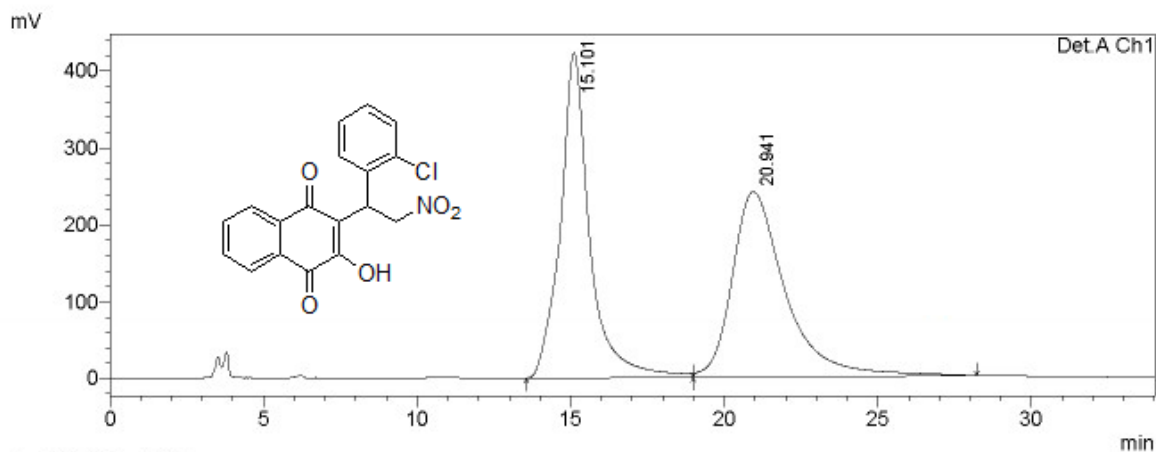

1 Det.A Ch1/254nm

PeakTable

Detector A Ch1 254nm

| Peak# | Ret. Time | Area     | Height | Area %  | Height % |
|-------|-----------|----------|--------|---------|----------|
| 1     | 15.101    | 28158641 | 422664 | 49.244  | 63.684   |
| 2     | 20.941    | 29022822 | 241030 | 50.756  | 36.316   |
| Total |           | 57181464 | 663694 | 100.000 | 100.000  |

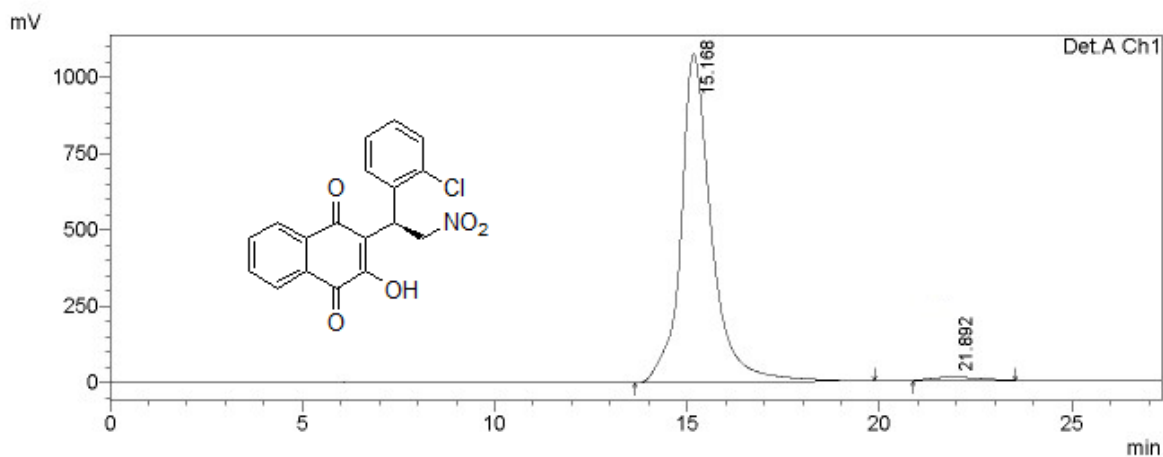

1 Det.A Ch1/254nm

PeakTable

Detector A Ch1 254nm

| Peak# | Ret. Time | Area     | Height  | Area %  | Height % |
|-------|-----------|----------|---------|---------|----------|
| 1     | 15.168    | 59692306 | 1075643 | 98.482  | 99.039   |
| 2     | 21.892    | 919995   | 10441   | 1.518   | 0.961    |
| Total |           | 60612301 | 1086085 | 100.000 | 100.000  |



### 2-(1-(2-bromophenyl)-2-nitroethyl)-3-hydroxynaphthalene-1,4-dione(3j)

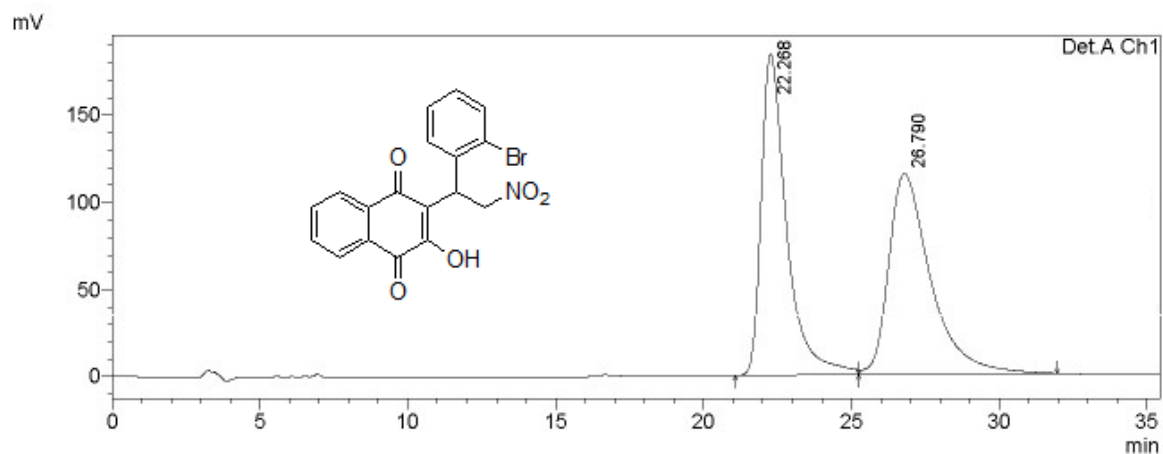

1 Det.A Ch1/254nm

PeakTable

Detector A Ch1 254nm

| Peak# | Ret. Time | Area     | Height | Area %  | Height % |
|-------|-----------|----------|--------|---------|----------|
| 1     | 22.268    | 11038178 | 184512 | 49.188  | 61.518   |
| 2     | 26.790    | 11402402 | 115422 | 50.812  | 38.482   |
| Total |           | 22440580 | 299933 | 100.000 | 100.000  |

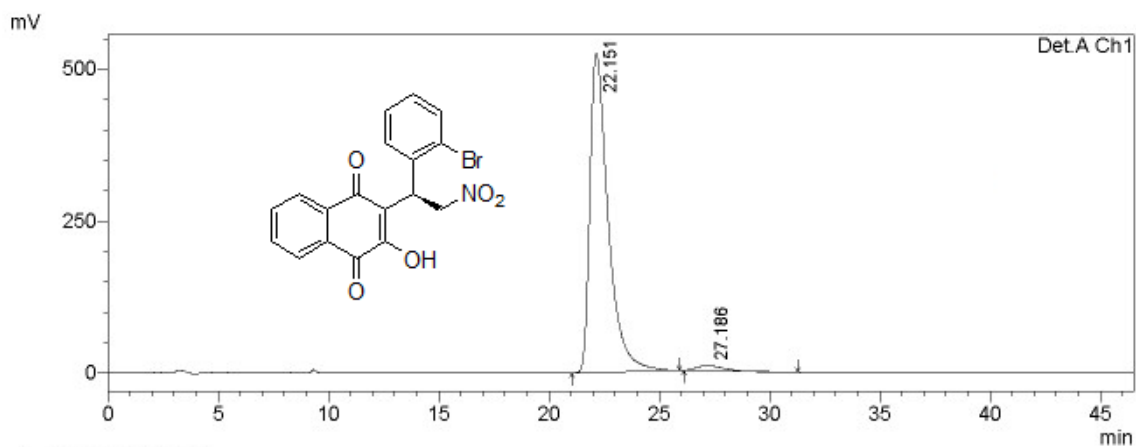

1 Det.A Ch1/254nm

PeakTable

Detector A Ch1 254nm

| Peak# | Ret. Time | Area     | Height | Area %  | Height % |
|-------|-----------|----------|--------|---------|----------|
| 1     | 22.151    | 30233880 | 525671 | 97.637  | 98.389   |
| 2     | 27.186    | 731730   | 8605   | 2.363   | 1.611    |
| Total |           | 30965609 | 534276 | 100.000 | 100.000  |

### 2-hydroxy-3-(1-(naphthalen-2-yl)-2-nitroethyl)naphthalene-1,4-dione(3k)

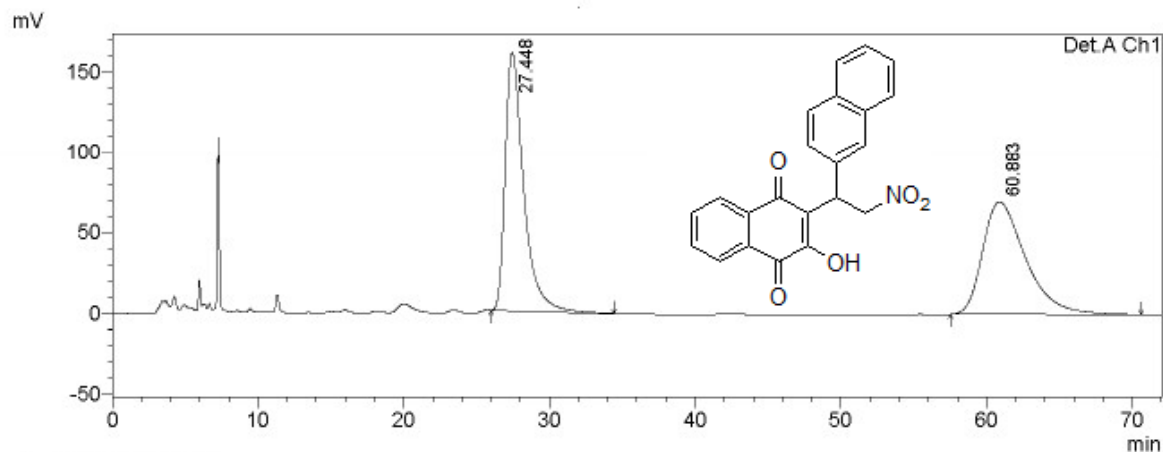

1 Det.A Ch1/254nm

PeakTable

Detector A Ch1 254nm

| Peak# | Ret. Time | Area     | Height | Area %  | Height % |
|-------|-----------|----------|--------|---------|----------|
| 1     | 27.448    | 14076910 | 160267 | 49.592  | 69.673   |
| 2     | 60.883    | 14308276 | 69759  | 50.408  | 30.327   |
| Total |           | 28385186 | 230026 | 100.000 | 100.000  |

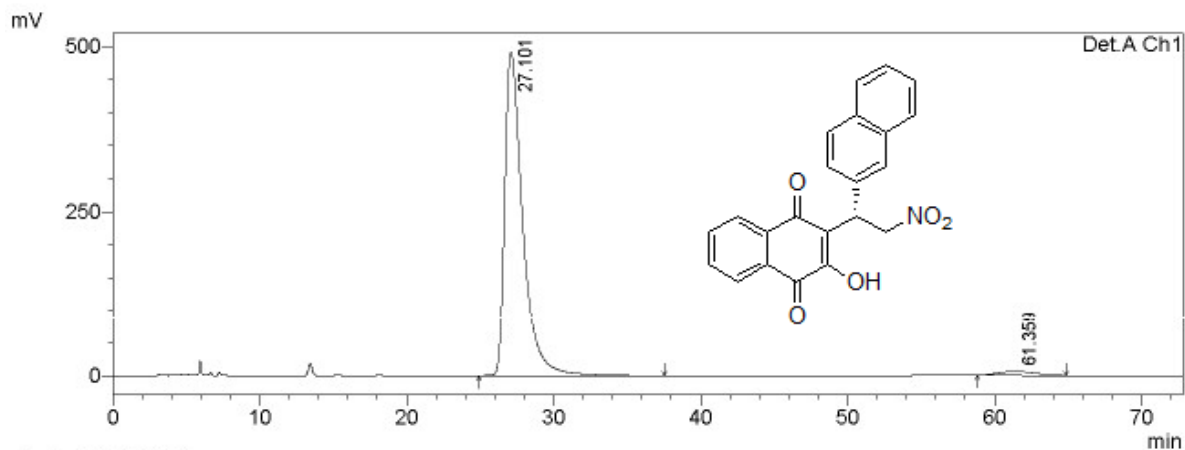

1 Det.A Ch1/254nm

PeakTable

Detector A Ch1 254nm

| Peak# | Ret. Time | Area     | Height | Area %  | Height % |
|-------|-----------|----------|--------|---------|----------|
| 1     | 27.101    | 42089913 | 492512 | 97.499  | 98.784   |
| 2     | 61.359    | 1079889  | 6064   | 2.501   | 1.216    |
| Total |           | 43169802 | 498576 | 100.000 | 100.000  |

## 2-(1-(2,4-dichlorophenyl)-2-nitroethyl)-3-hydroxynaphthalene-1,4-dione(3I)

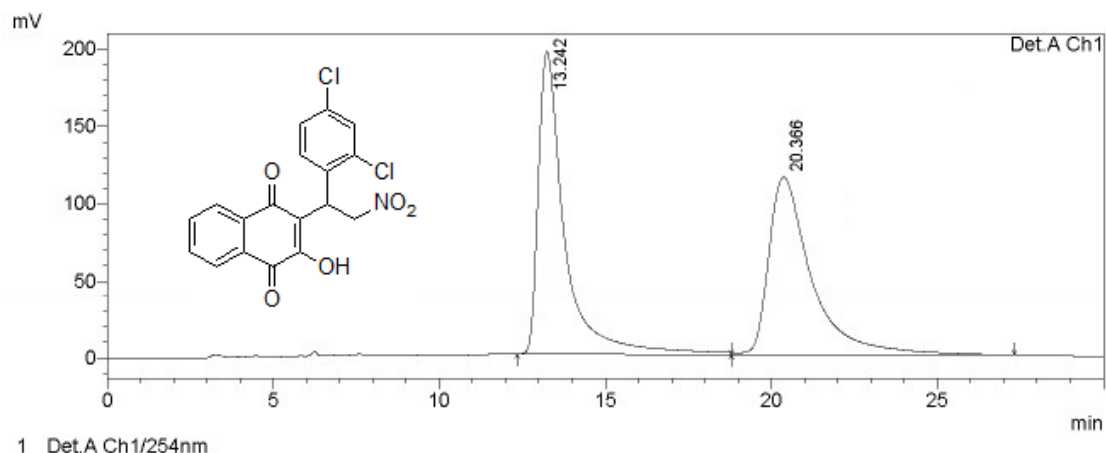

PeakTable

Detector A Ch1 254nm

| Peak# | Ret. Time | Area     | Height | Area %  | Height % |
|-------|-----------|----------|--------|---------|----------|
| 1     | 13.242    | 10801413 | 196114 | 51.047  | 62.972   |
| 2     | 20.366    | 10358254 | 115318 | 48.953  | 37.028   |
| Total |           | 21159667 | 311433 | 100.000 | 100.000  |

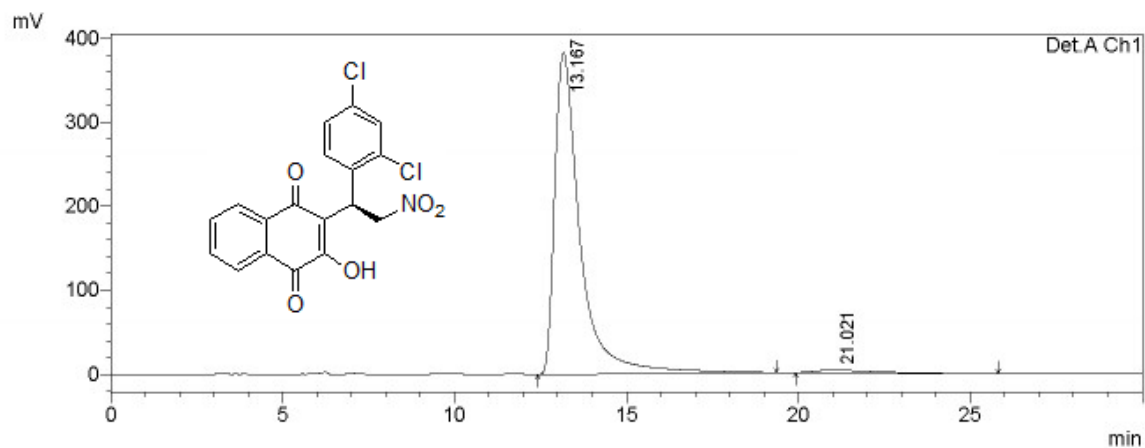

PeakTable

Detector A Ch1 254nm

| Peak# | Ret. Time | Area     | Height | Area %  | Height % |
|-------|-----------|----------|--------|---------|----------|
| 1     | 13.167    | 19662800 | 382901 | 98.011  | 99.136   |
| 2     | 21.021    | 399066   | 3337   | 1.989   | 0.864    |
| Total |           | 20061866 | 386238 | 100.000 | 100.000  |

## 2-(1-(3,4-dichlorophenyl)-2-nitroethyl)-3-hydroxynaphthalene-1,4-dione(3m)

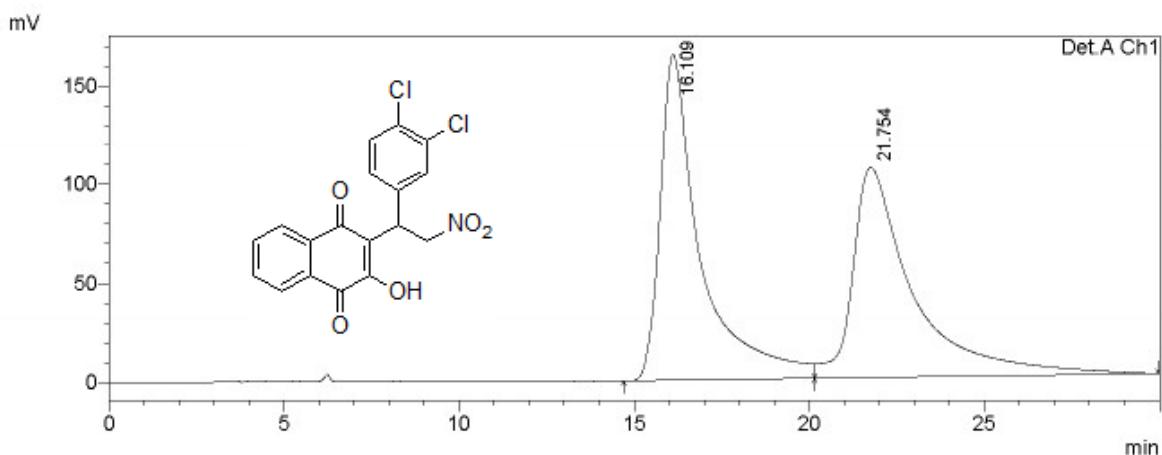

1 Det.A Ch1/254nm

PeakTable

Detector A Ch1 254nm

| Peak# | Ret. Time | Area     | Height | Area %  | Height % |
|-------|-----------|----------|--------|---------|----------|
| 1     | 16.109    | 13174754 | 164773 | 50.764  | 60.832   |
| 2     | 21.754    | 12778122 | 106092 | 49.236  | 39.168   |
| Total |           | 25952876 | 270865 | 100.000 | 100.000  |

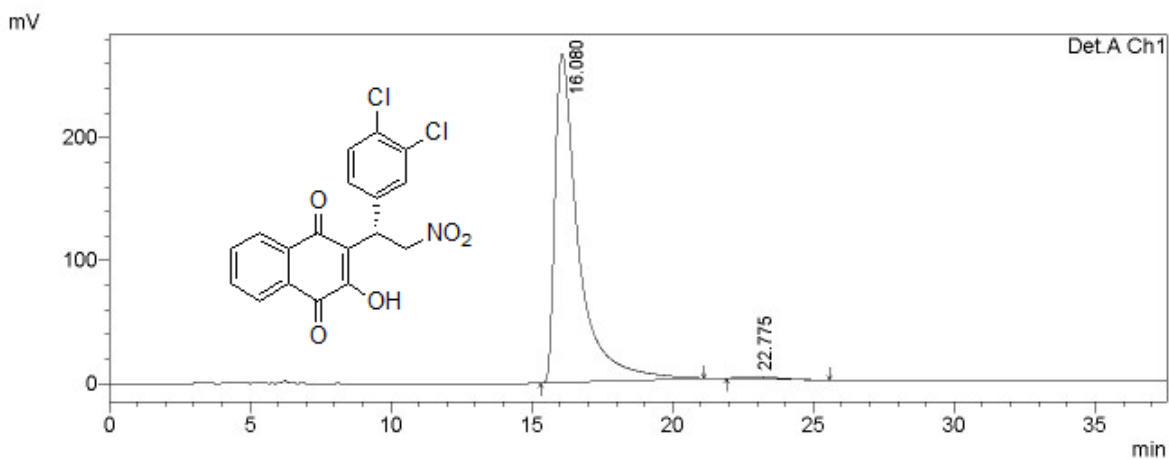

1 Det.A Ch1/254nm

PeakTable

Detector A Ch1 254nm

| Peak# | Ret. Time | Area     | Height | Area %  | Height % |
|-------|-----------|----------|--------|---------|----------|
| 1     | 16.080    | 15568186 | 267697 | 98.818  | 99.319   |
| 2     | 22.775    | 186138   | 1834   | 1.182   | 0.681    |
| Total |           | 15754324 | 269531 | 100.000 | 100.000  |

## 2-(1-(3,5-dimethylphenyl)-2-nitroethyl)-3-hydroxynaphthalene-1,4-dione(3n)

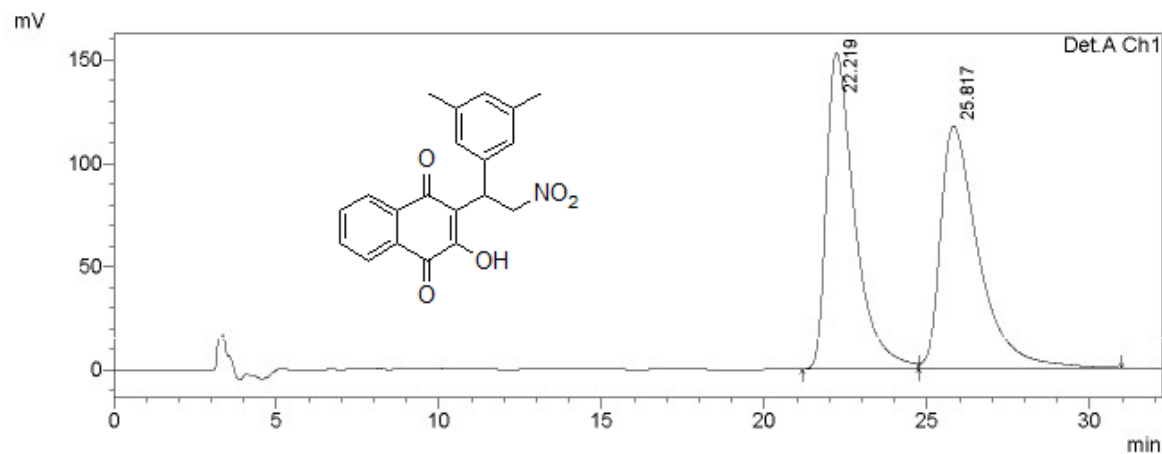

1 Det.A Ch1/254nm

PeakTable

Detector A Ch1 254nm

| Peak# | Ret. Time | Area     | Height | Area %  | Height % |
|-------|-----------|----------|--------|---------|----------|
| 1     | 22.219    | 9252657  | 153153 | 49.222  | 56.585   |
| 2     | 25.817    | 9545332  | 117506 | 50.778  | 43.415   |
| Total |           | 18797989 | 270659 | 100.000 | 100.000  |

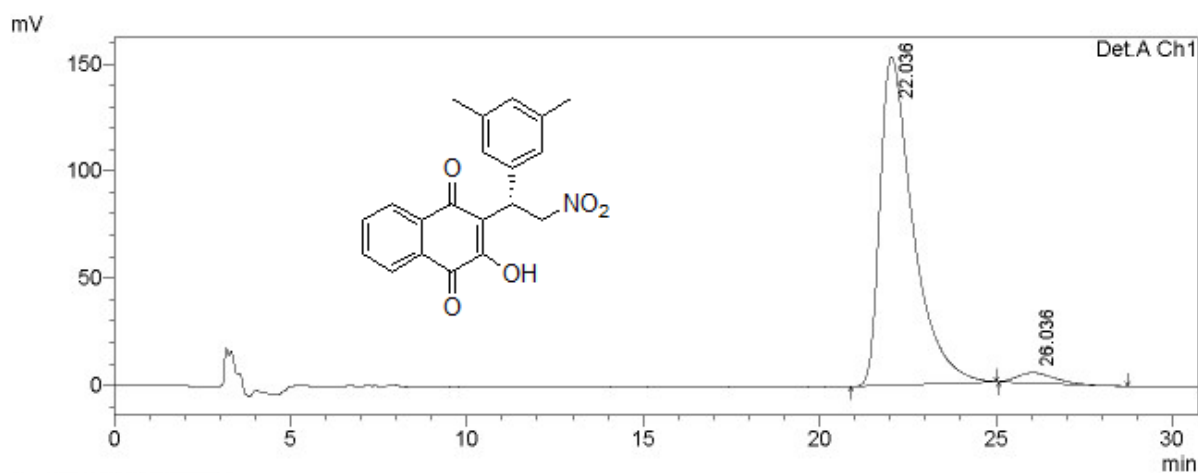

1 Det.A Ch1/254nm

PeakTable

Detector A Ch1 254nm

| Peak# | Ret. Time | Area     | Height | Area %  | Height % |
|-------|-----------|----------|--------|---------|----------|
| 1     | 22.036    | 9931583  | 153111 | 96.848  | 97.052   |
| 2     | 26.036    | 323261   | 4650   | 3.152   | 2.948    |
| Total |           | 10254844 | 157762 | 100.000 | 100.000  |

**2-(1-cyclohexyl-2-nitroethyl)-3-hydroxynaphthalene-1,4-dione(3o)**

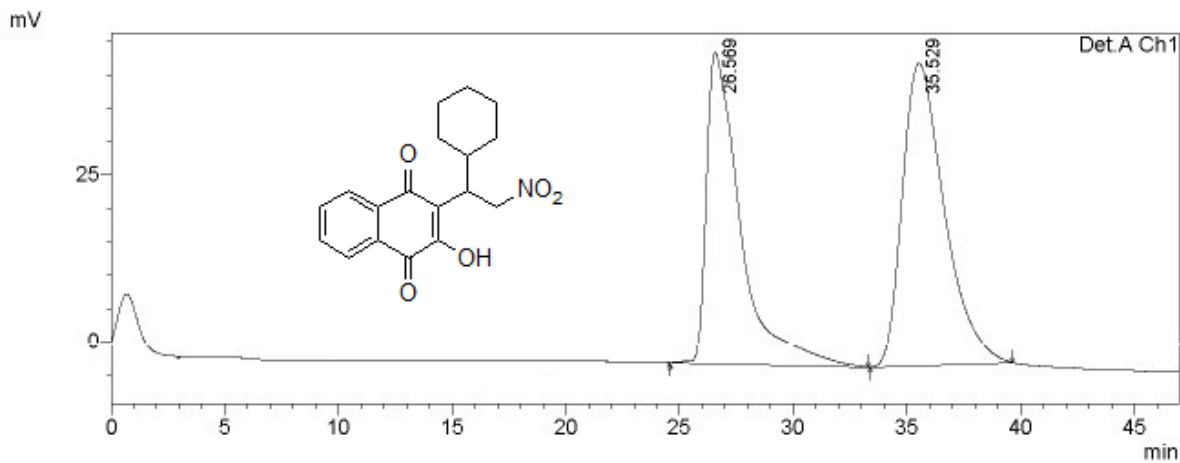

1 Det.A Ch1/254nm

PeakTable

Detector A Ch1 254nm

| Peak# | Ret. Time | Area     | Height | Area %  | Height % |
|-------|-----------|----------|--------|---------|----------|
| 1     | 26.569    | 4860745  | 46807  | 45.365  | 50.732   |
| 2     | 35.529    | 5854063  | 45456  | 54.635  | 49.268   |
| Total |           | 10714808 | 92264  | 100.000 | 100.000  |

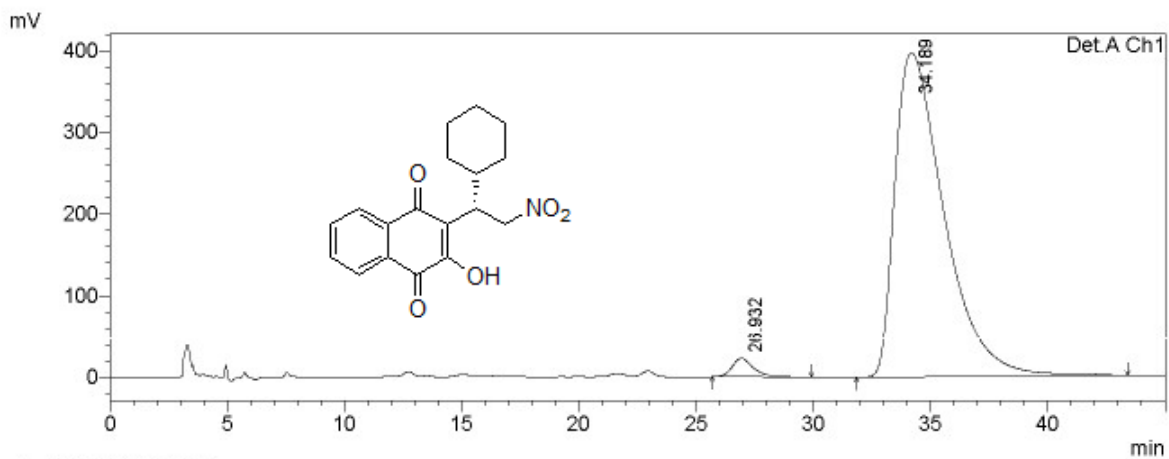

1 Det.A Ch1/254nm

PeakTable

Detector A Ch1 254nm

| Peak# | Ret. Time | Area     | Height | Area %  | Height % |
|-------|-----------|----------|--------|---------|----------|
| 1     | 26.932    | 1446497  | 22845  | 2.422   | 5.437    |
| 2     | 34.189    | 58266394 | 397357 | 97.578  | 94.563   |
| Total |           | 59712891 | 420202 | 100.000 | 100.000  |

### 2-(1-(furan-2-yl)-2-nitroethyl)-3-hydroxynaphthalene-1,4-dione(3p)

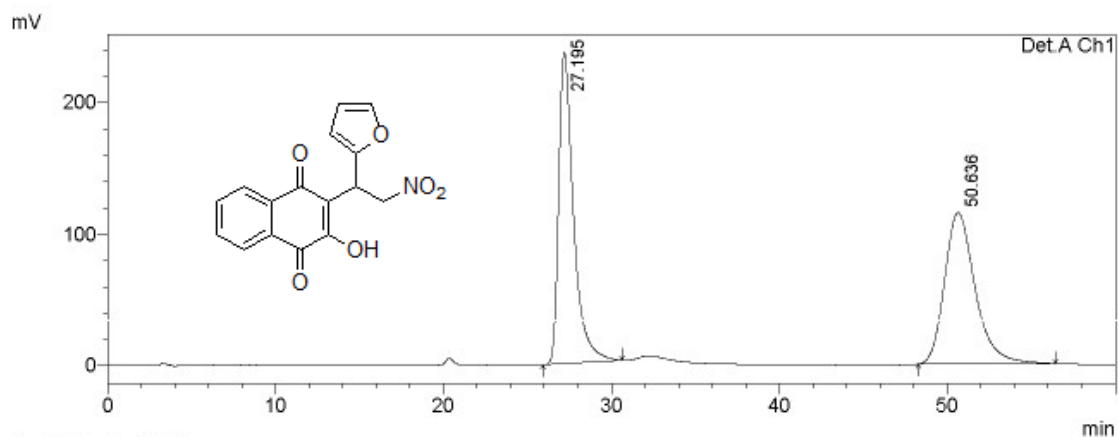

1 Det.A Ch1/254nm

PeakTable

Detector A Ch1 254nm

| Peak# | Ret. Time | Area     | Height | Area %  | Height % |
|-------|-----------|----------|--------|---------|----------|
| 1     | 27.195    | 14600870 | 236948 | 49.979  | 67.254   |
| 2     | 50.636    | 14613210 | 115371 | 50.021  | 32.746   |
| Total |           | 29214080 | 352319 | 100.000 | 100.000  |

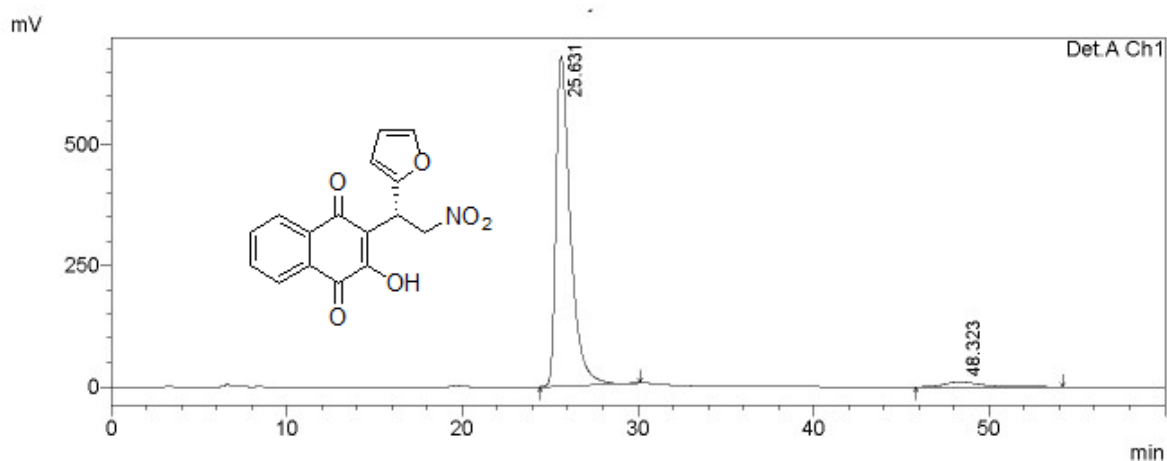

1 Det.A Ch1/254nm

PeakTable

Detector A Ch1 254nm

| Peak# | Ret. Time | Area     | Height | Area %  | Height % |
|-------|-----------|----------|--------|---------|----------|
| 1     | 25.631    | 38557072 | 680857 | 96.346  | 98.487   |
| 2     | 48.323    | 1462149  | 10461  | 3.654   | 1.513    |
| Total |           | 40019221 | 691318 | 100.000 | 100.000  |

### 2-hydroxy-3-(1-nitropentan-2-yl)naphthalene-1,4-dione(3q)

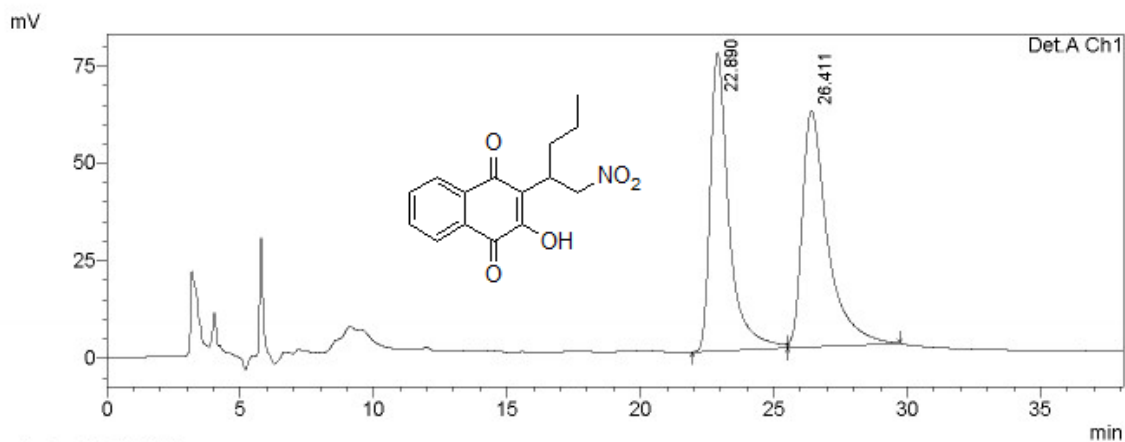

1 Det.A Ch1/254nm

PeakTable

Detector A Ch1 254nm

| Peak# | Ret. Time | Area    | Height | Area %  | Height % |
|-------|-----------|---------|--------|---------|----------|
| 1     | 22.890    | 3719758 | 76606  | 48.166  | 55.772   |
| 2     | 26.411    | 4003070 | 60750  | 51.834  | 44.228   |
| Total |           | 7722828 | 137356 | 100.000 | 100.000  |

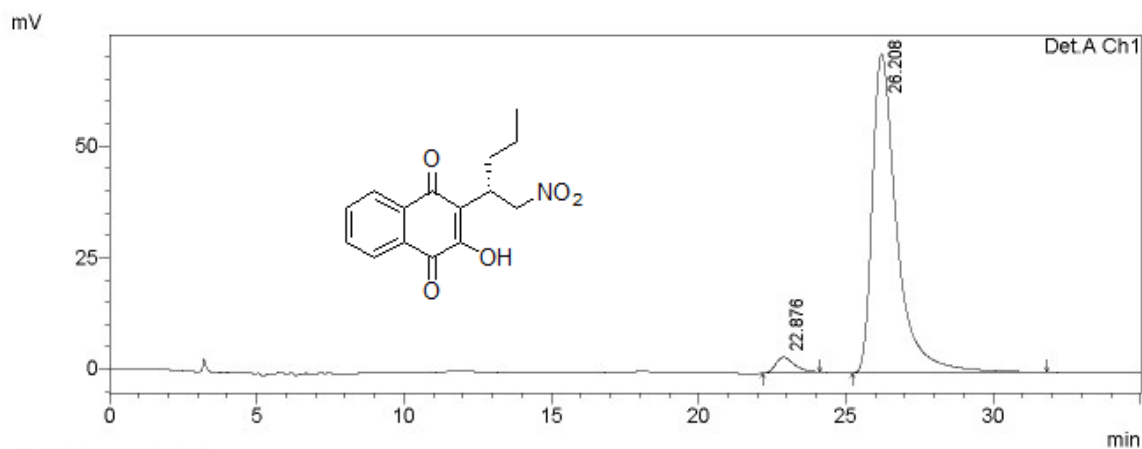

1 Det.A Ch1/254nm

PeakTable

Detector A Ch1 254nm

| Peak# | Ret. Time | Area    | Height | Area %  | Height % |
|-------|-----------|---------|--------|---------|----------|
| 1     | 22.876    | 156233  | 3501   | 3.616   | 4.658    |
| 2     | 26.208    | 4163820 | 71655  | 96.384  | 95.342   |
| Total |           | 4320053 | 75156  | 100.000 | 100.000  |



## 2-(1-(2-(benzyloxy)phenyl)-2-nitroethyl)-3-hydroxynaphthalene-1,4-dione(3r)

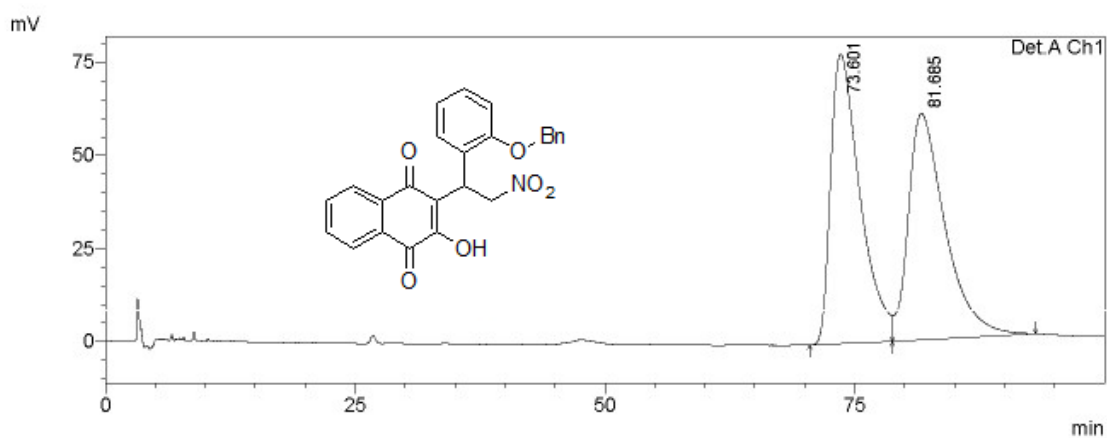

1 Det.A Ch1/254nm

PeakTable

| Peak# | Ret. Time | Area     | Height | Area %  | Height % |
|-------|-----------|----------|--------|---------|----------|
| 1     | 73.601    | 15943143 | 77743  | 50.411  | 56.126   |
| 2     | 81.685    | 15683435 | 60772  | 49.589  | 43.874   |
| Total |           | 31626577 | 138515 | 100.000 | 100.000  |

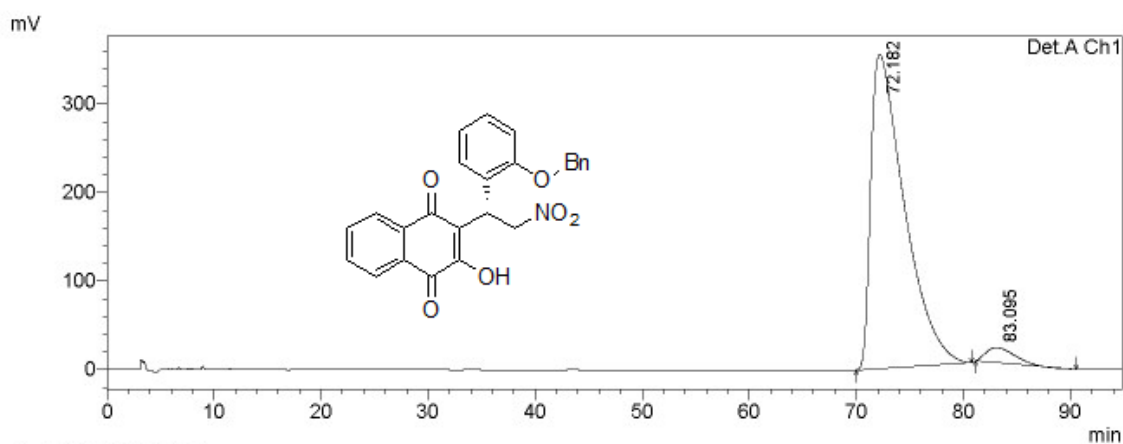

1 Det.A Ch1/254nm

PeakTable

| Peak# | Ret. Time | Area     | Height | Area %  | Height % |
|-------|-----------|----------|--------|---------|----------|
| 1     | 72.182    | 77268519 | 355200 | 96.290  | 95.509   |
| 2     | 83.095    | 2976940  | 16701  | 3.710   | 4.491    |
| Total |           | 80245460 | 371901 | 100.000 | 100.000  |

### 2-hydroxy-3-(2-nitro-1-(thiophen-2-yl)ethyl)naphthalene-1,4-dione(3s)

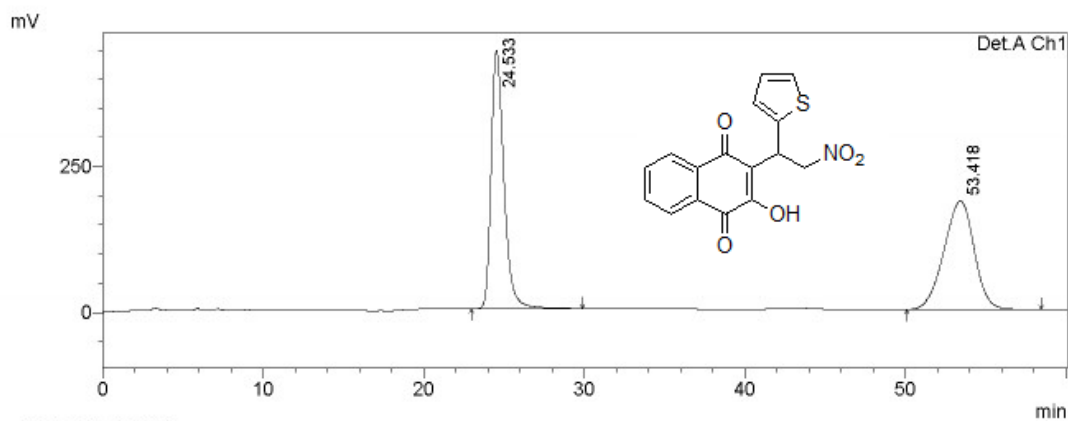

1 Det.A Ch1/254nm

PeakTable

Detector A Ch1 254nm

| Peak# | Ret. Time | Area     | Height | Area %  | Height % |
|-------|-----------|----------|--------|---------|----------|
| 1     | 24.533    | 24486442 | 443239 | 50.109  | 70.432   |
| 2     | 53.418    | 24379847 | 186080 | 49.891  | 29.568   |
| Total |           | 48866289 | 629319 | 100.000 | 100.000  |

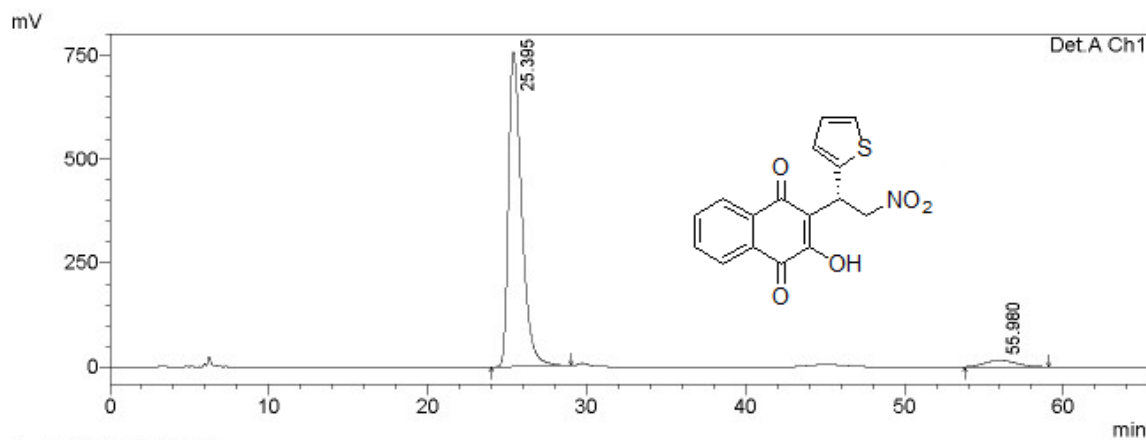

1 Det.A Ch1/254nm

PeakTable

Detector A Ch1 254nm

| Peak# | Ret. Time | Area     | Height | Area %  | Height % |
|-------|-----------|----------|--------|---------|----------|
| 1     | 25.395    | 43545454 | 757450 | 95.354  | 97.995   |
| 2     | 55.980    | 2121847  | 15497  | 4.646   | 2.005    |
| Total |           | 45667301 | 772947 | 100.000 | 100.000  |

## 2-hydroxy-3-(1-(2-methoxyphenyl)-2-nitroethyl)naphthalene-1,4-dione(3t)

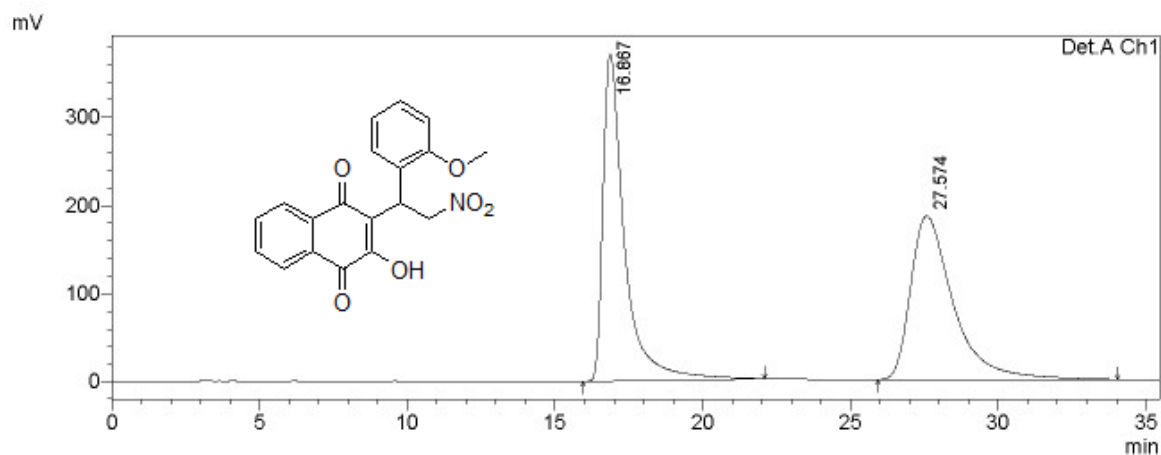

1 Det.A Ch1/254nm

PeakTable

Detector A Ch1 254nm

| Peak# | Ret. Time | Area     | Height | Area %  | Height % |
|-------|-----------|----------|--------|---------|----------|
| 1     | 16.867    | 18814354 | 370885 | 50.084  | 66.572   |
| 2     | 27.574    | 18751286 | 186231 | 49.916  | 33.428   |
| Total |           | 37565639 | 557116 | 100.000 | 100.000  |

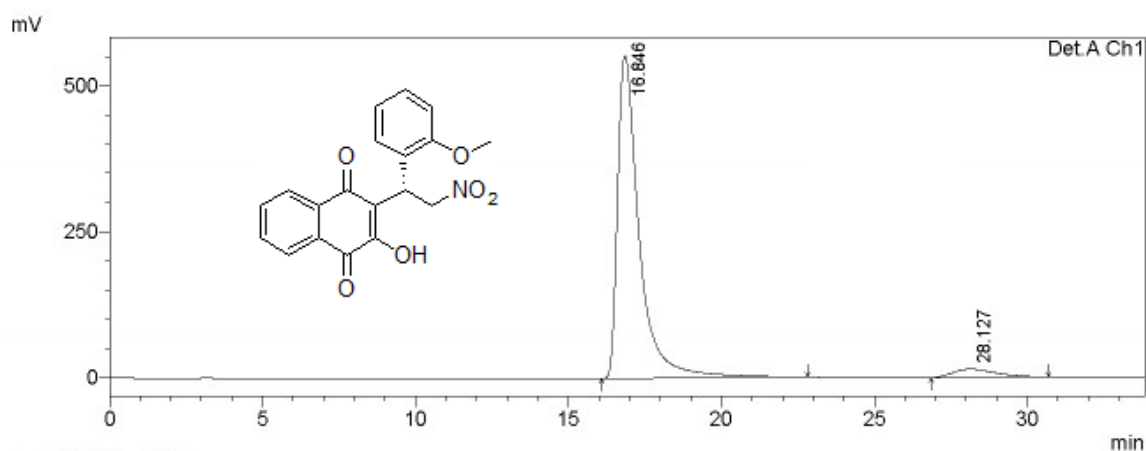

1 Det.A Ch1/254nm

PeakTable

Detector A Ch1 254nm

| Peak# | Ret. Time | Area     | Height | Area %  | Height % |
|-------|-----------|----------|--------|---------|----------|
| 1     | 16.846    | 27156264 | 551780 | 95.082  | 97.476   |
| 2     | 28.127    | 1404679  | 14285  | 4.918   | 2.524    |
| Total |           | 28560943 | 566066 | 100.000 | 100.000  |

## 2-hydroxy-3-(2-nitro-1-phenylpropyl)naphthalene-1,4-dione(3u)

### <Chromatogram>

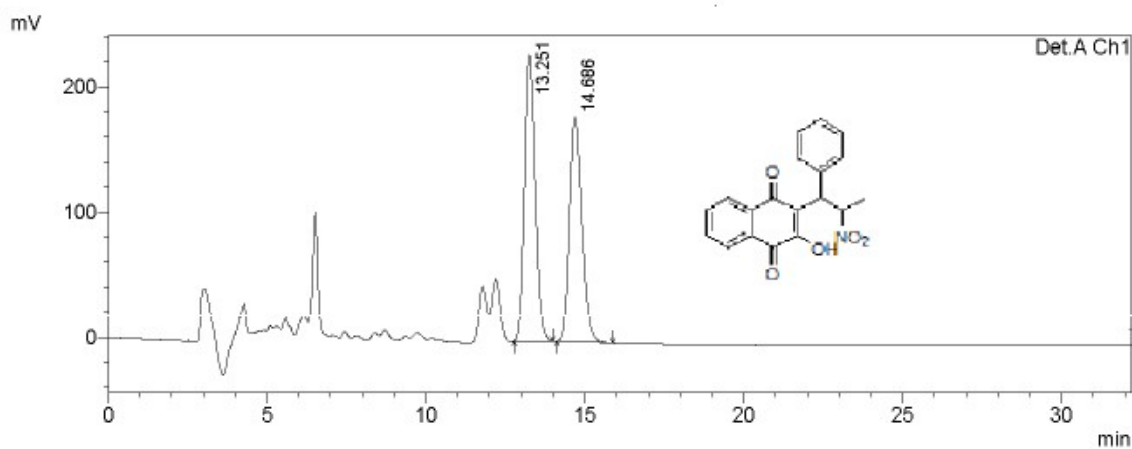

1 Det.A Ch1/220nm

PeakTable

Detector A Ch1 220nm

| Peak# | Ret. Time | Area     | Height | Area %  | Height % |
|-------|-----------|----------|--------|---------|----------|
| 1     | 13.251    | 5320995  | 228503 | 52.114  | 56.086   |
| 2     | 14.686    | 4889365  | 178916 | 47.886  | 43.914   |
| Total |           | 10210360 | 407419 | 100.000 | 100.000  |

### <Chromatogram>

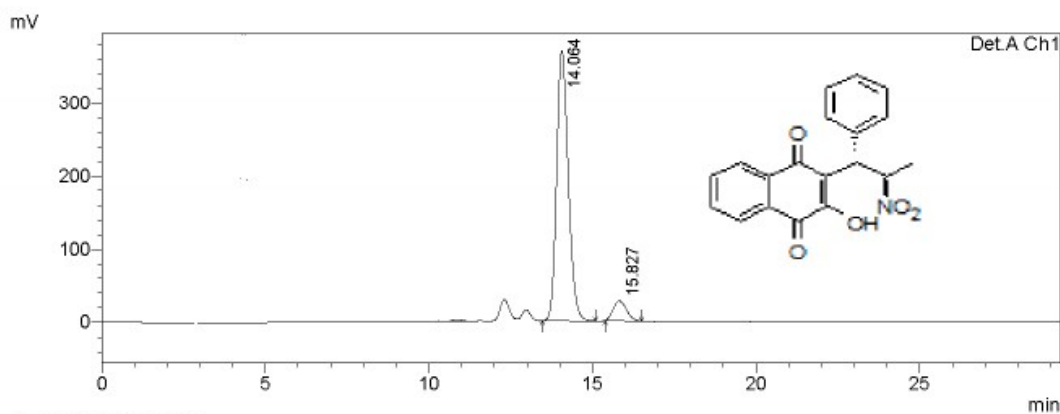

1 Det.A Ch1/220nm

PeakTable

Detector A Ch1 220nm

| Peak# | Ret. Time | Area    | Height | Area %  | Height % |
|-------|-----------|---------|--------|---------|----------|
| 1     | 14.064    | 9208540 | 369242 | 92.789  | 93.316   |
| 2     | 15.827    | 715650  | 26450  | 7.211   | 6.684    |
| Total |           | 9924190 | 395692 | 100.000 | 100.000  |
